# Supplementary material for: Schoberine B, an alkaloid with an unprecedented straight C5 side chain, and myriberine B from Myrioneuron faberi
Source: Royal Society of Chemistry journal article supplement (doi:10.1039/c5ra25218k), 2016-01-01
Supplement: c5ra25218k1.pdf [file c5ra25218k1.pdf]

## Electronic Supplementary Information (ESI)

# Schoberine B, Alkaloid with Unprecedented Straight C<sub>5</sub> Side Chain and Myriberine B from *Myrioneuron faberi*

Ming-Ming Cao,<sup>a,b</sup> Yu Zhang,<sup>a</sup> Zong-Gen Peng,<sup>c</sup> Jian-Dong Jiang,<sup>c</sup> Yue-Jiao Gao,<sup>b</sup> and Xiao-Jiang Hao<sup>\*,a</sup>

<sup>a</sup> State Key Laboratory of Phytochemistry and Plant Resources in West China, Kunming Institute of Botany, Chinese Academy of Sciences, Kunming 650201, Yunnan, People's Republic of China

<sup>b</sup> College of Food Science and Technology, Nanjing Agricultural University, Nanjing 210095, Jiangsu, People's Republic of China

<sup>c</sup> Institute of Medicinal Biotechnology, Chinese Academy of Medical Sciences and Peking Union Medical College, Beijing 100050, People's Republic of China

\* To whom correspondence should be addressed. Tel: +86-871-65223263. Fax: +86-871-65223070.

E-mail: [haoxj@mail.kib.ac.cn](mailto:haoxj@mail.kib.ac.cn).

## Contents

|                                                                                                       |    |
|-------------------------------------------------------------------------------------------------------|----|
| S1.1 <sup>1</sup> H NMR spectrum of schoberine B (1) in pyridine- <i>d</i> <sub>5</sub> at 313K.....  | 3  |
| S1.2 <sup>13</sup> C NMR spectrum of schoberine B (1) in pyridine- <i>d</i> <sub>5</sub> at 313K..... | 4  |
| S1.3 HSQC spectrum of schoberine B (1) in pyridine- <i>d</i> <sub>5</sub> at 313K .....               | 5  |
| S1.4 COSY spectrum of schoberine B (1) in pyridine- <i>d</i> <sub>5</sub> at 313K .....               | 6  |
| S1.5 HMBC spectrum of schoberine B (1) in pyridine- <i>d</i> <sub>5</sub> at 313K .....               | 7  |
| S1.6 ROESY spectrum of schoberine B (1) in pyridine- <i>d</i> <sub>5</sub> at 313K.....               | 8  |
| S1.7 ESIMS and HREIMS spectrums of schoberine B (1).....                                              | 9  |
| S1.8 IR spectrum of schoberine B (1).....                                                             | 11 |
| S2.1 <sup>1</sup> H NMR spectrum of myriberine B (2) in methanol- <i>d</i> <sub>4</sub> at 313K.....  | 12 |
| S2.2 <sup>13</sup> C NMR spectrum of myriberine B (2) in methanol- <i>d</i> <sub>4</sub> at 313K..... | 13 |
| S2.3 HSQC spectrum of myriberine B (2) in methanol- <i>d</i> <sub>4</sub> at 313K.....                | 14 |
| S2.4 COSY spectrum of myriberine B (2) in methanol- <i>d</i> <sub>4</sub> at 313K.....                | 15 |
| S2.5 HMBC spectrum of myriberine B (2) in methanol- <i>d</i> <sub>4</sub> at 313K .....               | 16 |
| S2.6 ROESY spectrum of myriberine B (2) in methanol- <i>d</i> <sub>4</sub> at 313K .....              | 17 |
| S2.7 ESIMS and HREIMS spectrums of myriberine B (2) .....                                             | 18 |
| S2.8 IR spectrum of myriberine B (2).....                                                             | 20 |
| S2.9 ECD spectrum of myriberine B (2) in methanol.....                                                | 21 |
| EXPERIMENTAL SECTION .....                                                                            | 22 |

S1.1  $^1\text{H}$  NMR spectrum of schoberine B (**1**) in pyridine- $d_5$  at 313K

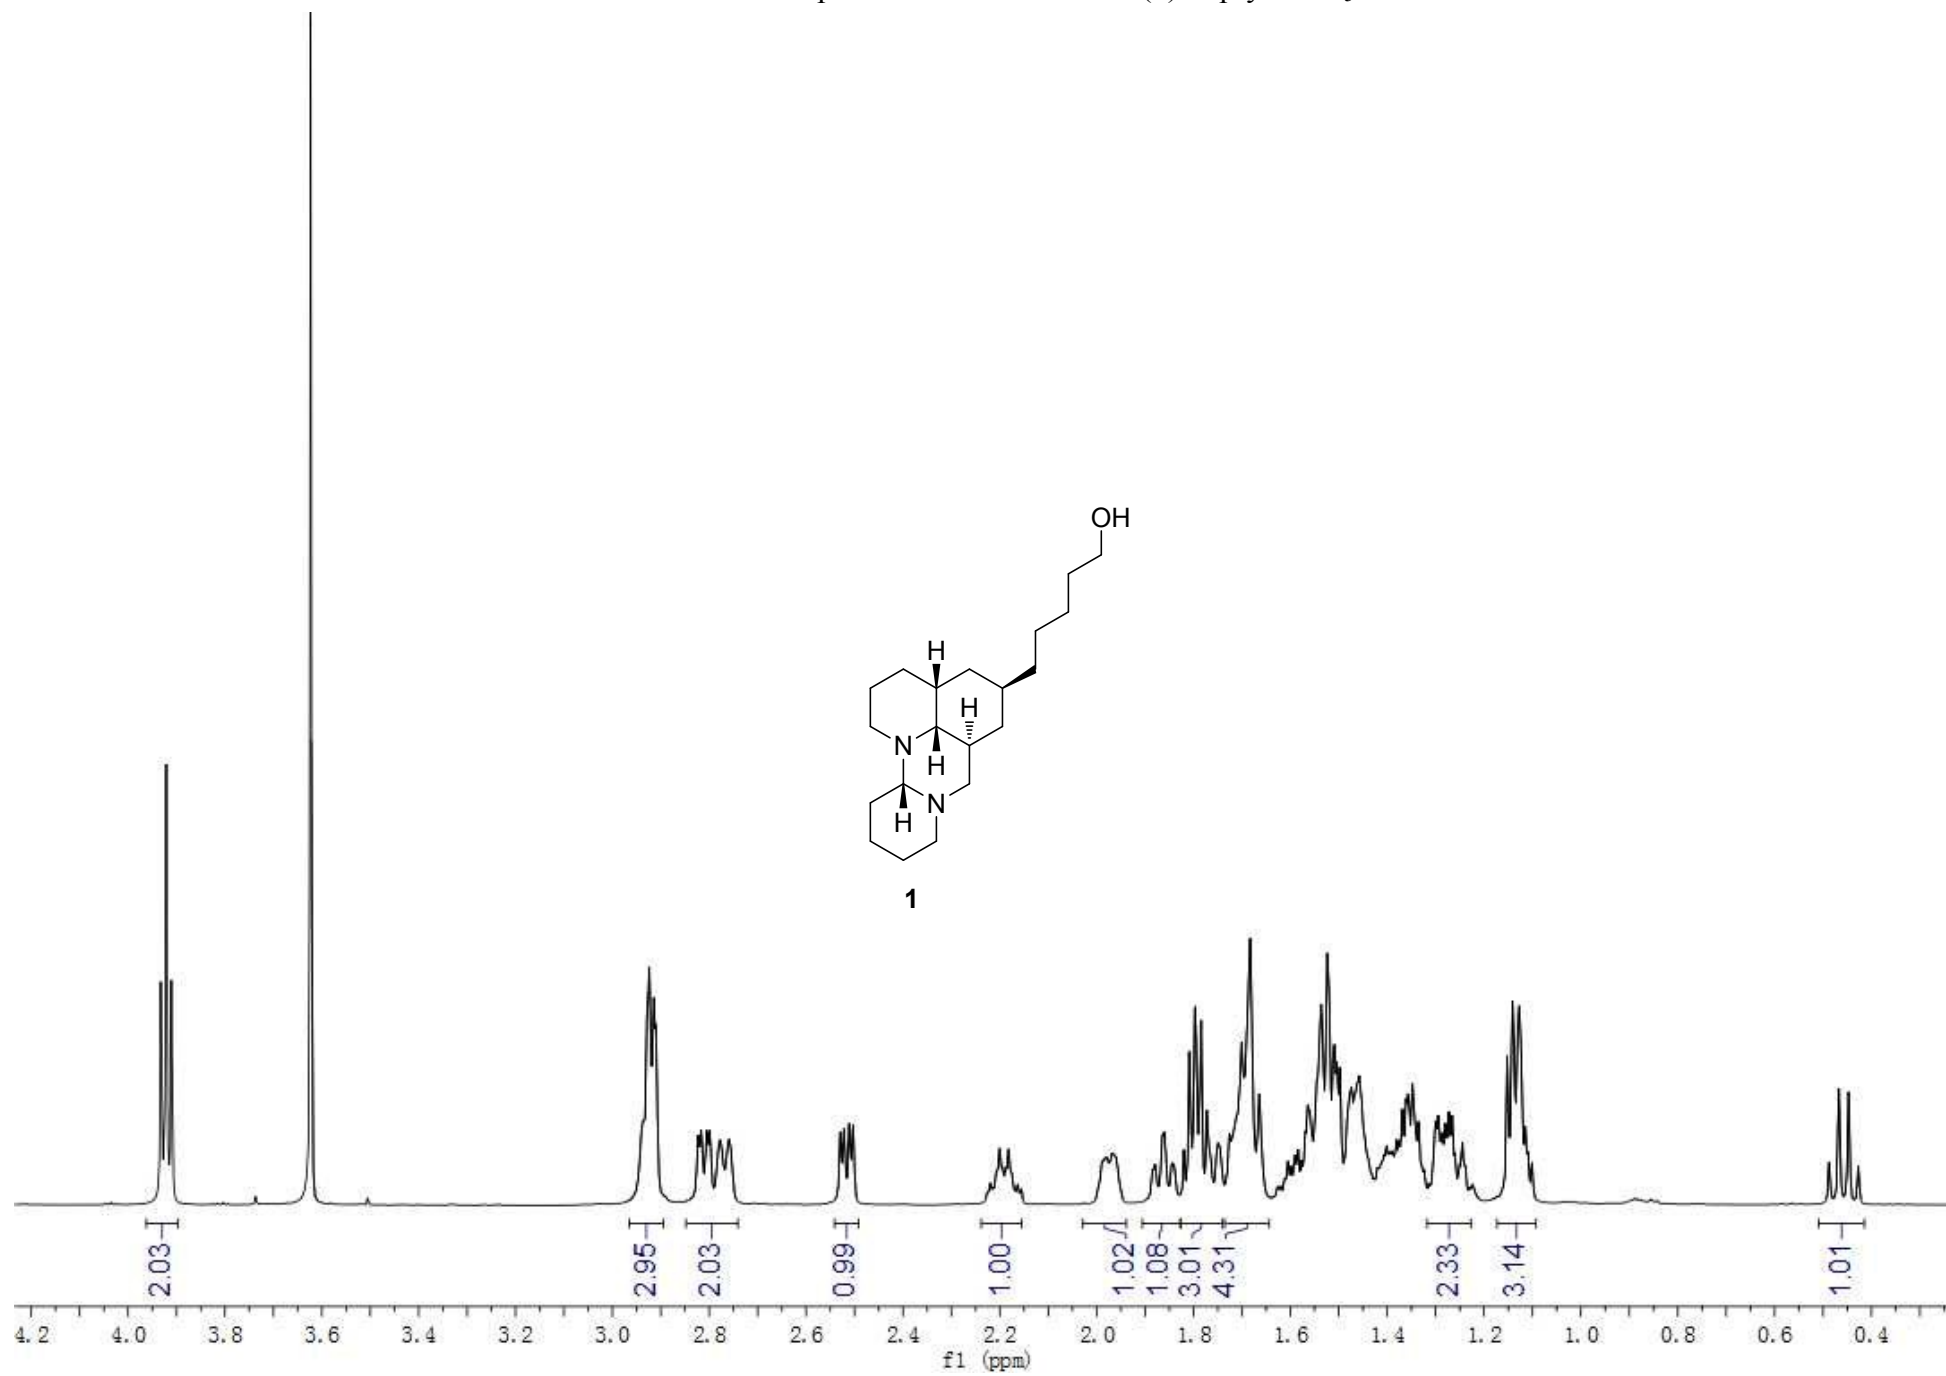

S1.2  $^{13}\text{C}$  NMR spectrum of schoberine B (**1**) in pyridine- $d_5$  at 313K

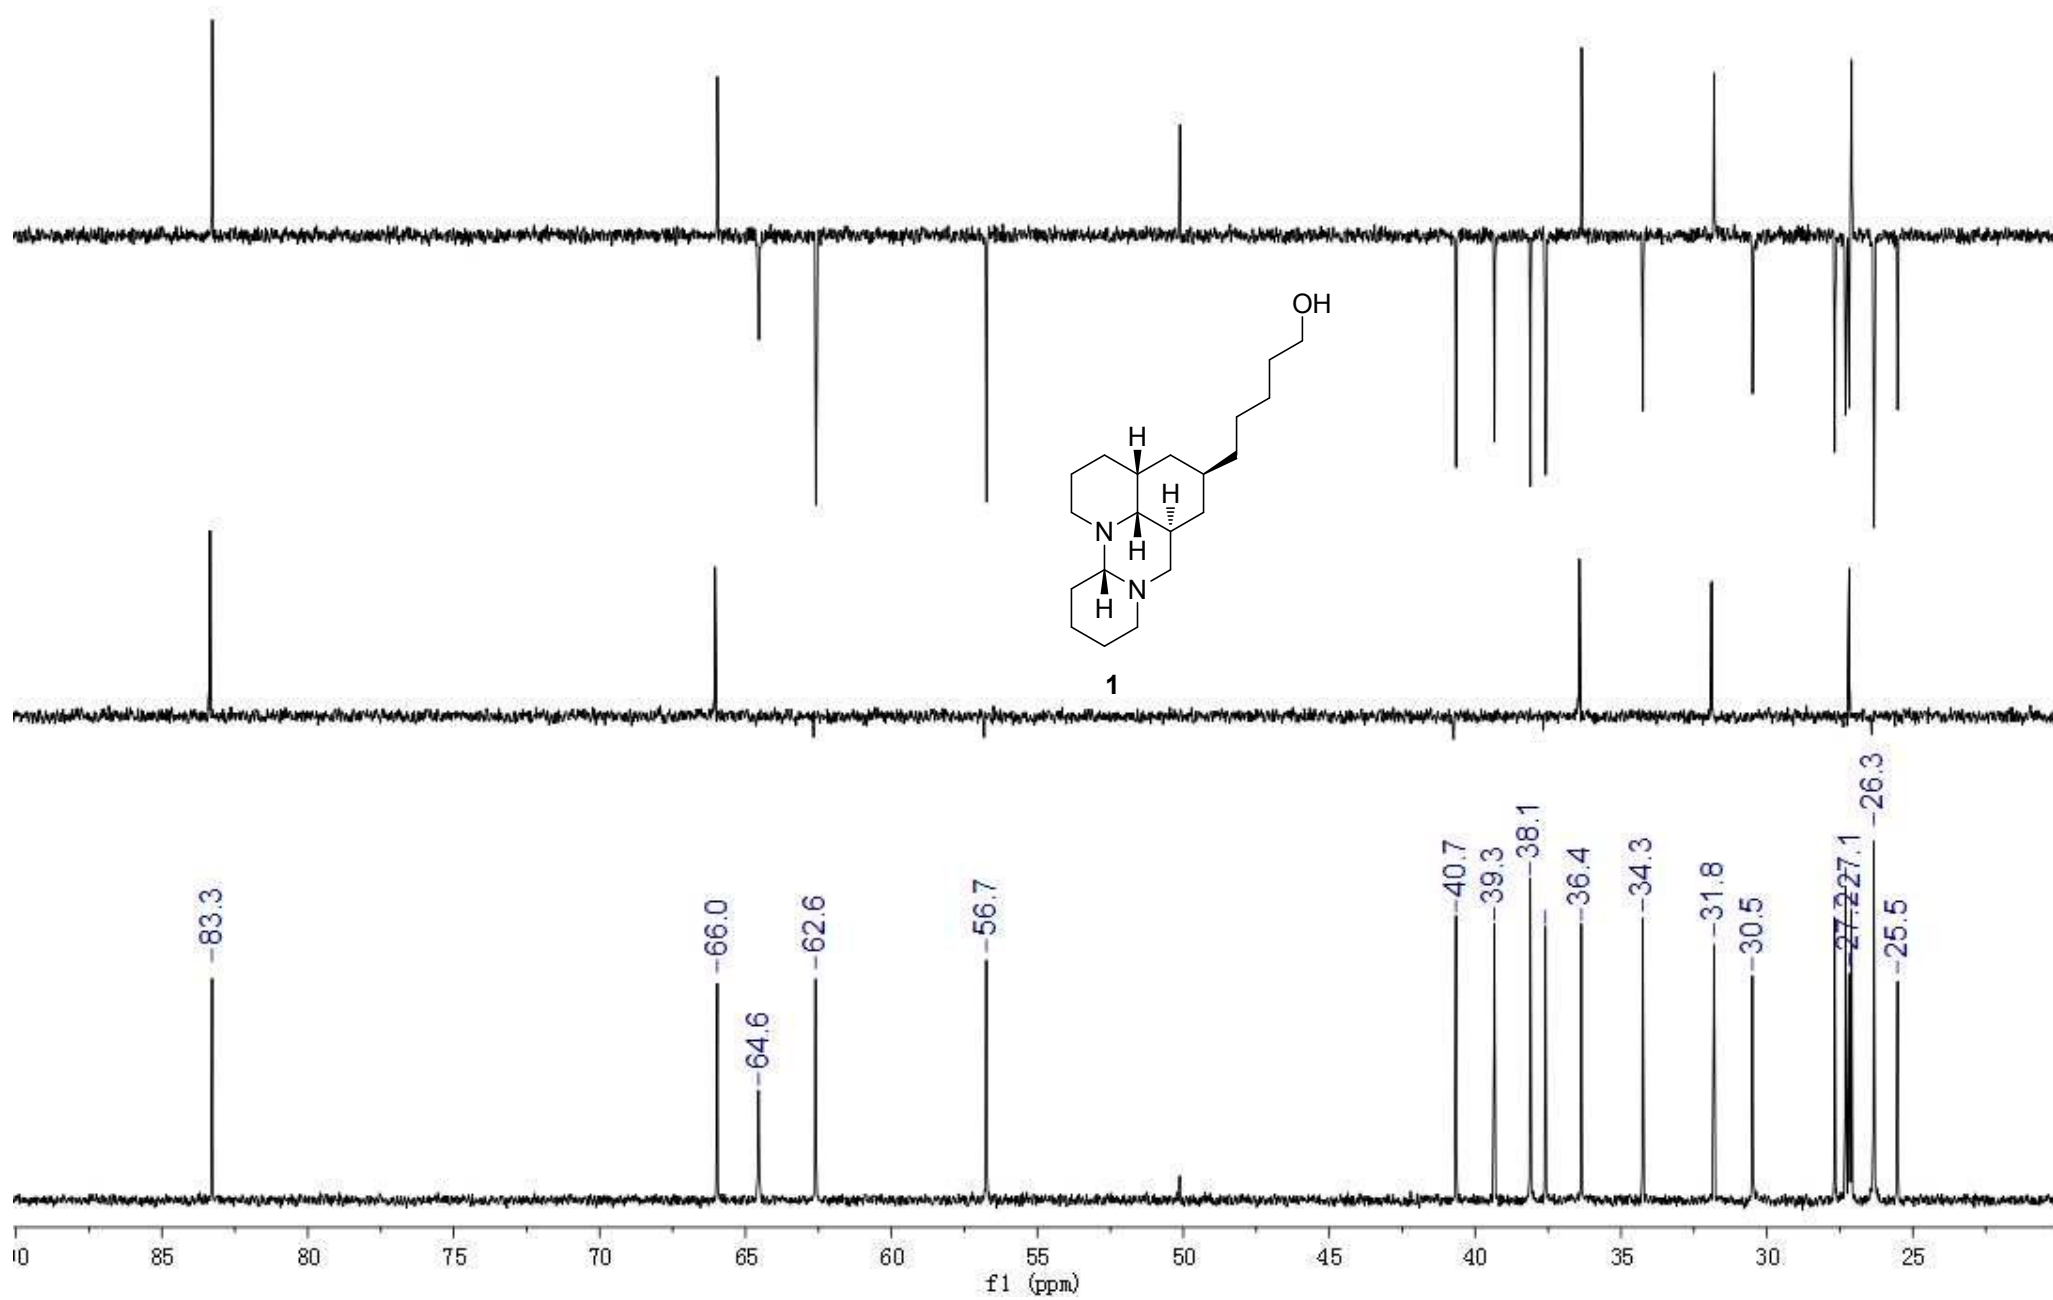

S1.3 HSQC spectrum of schoberine B (**1**) in pyridine-*d*<sub>5</sub> at 313K

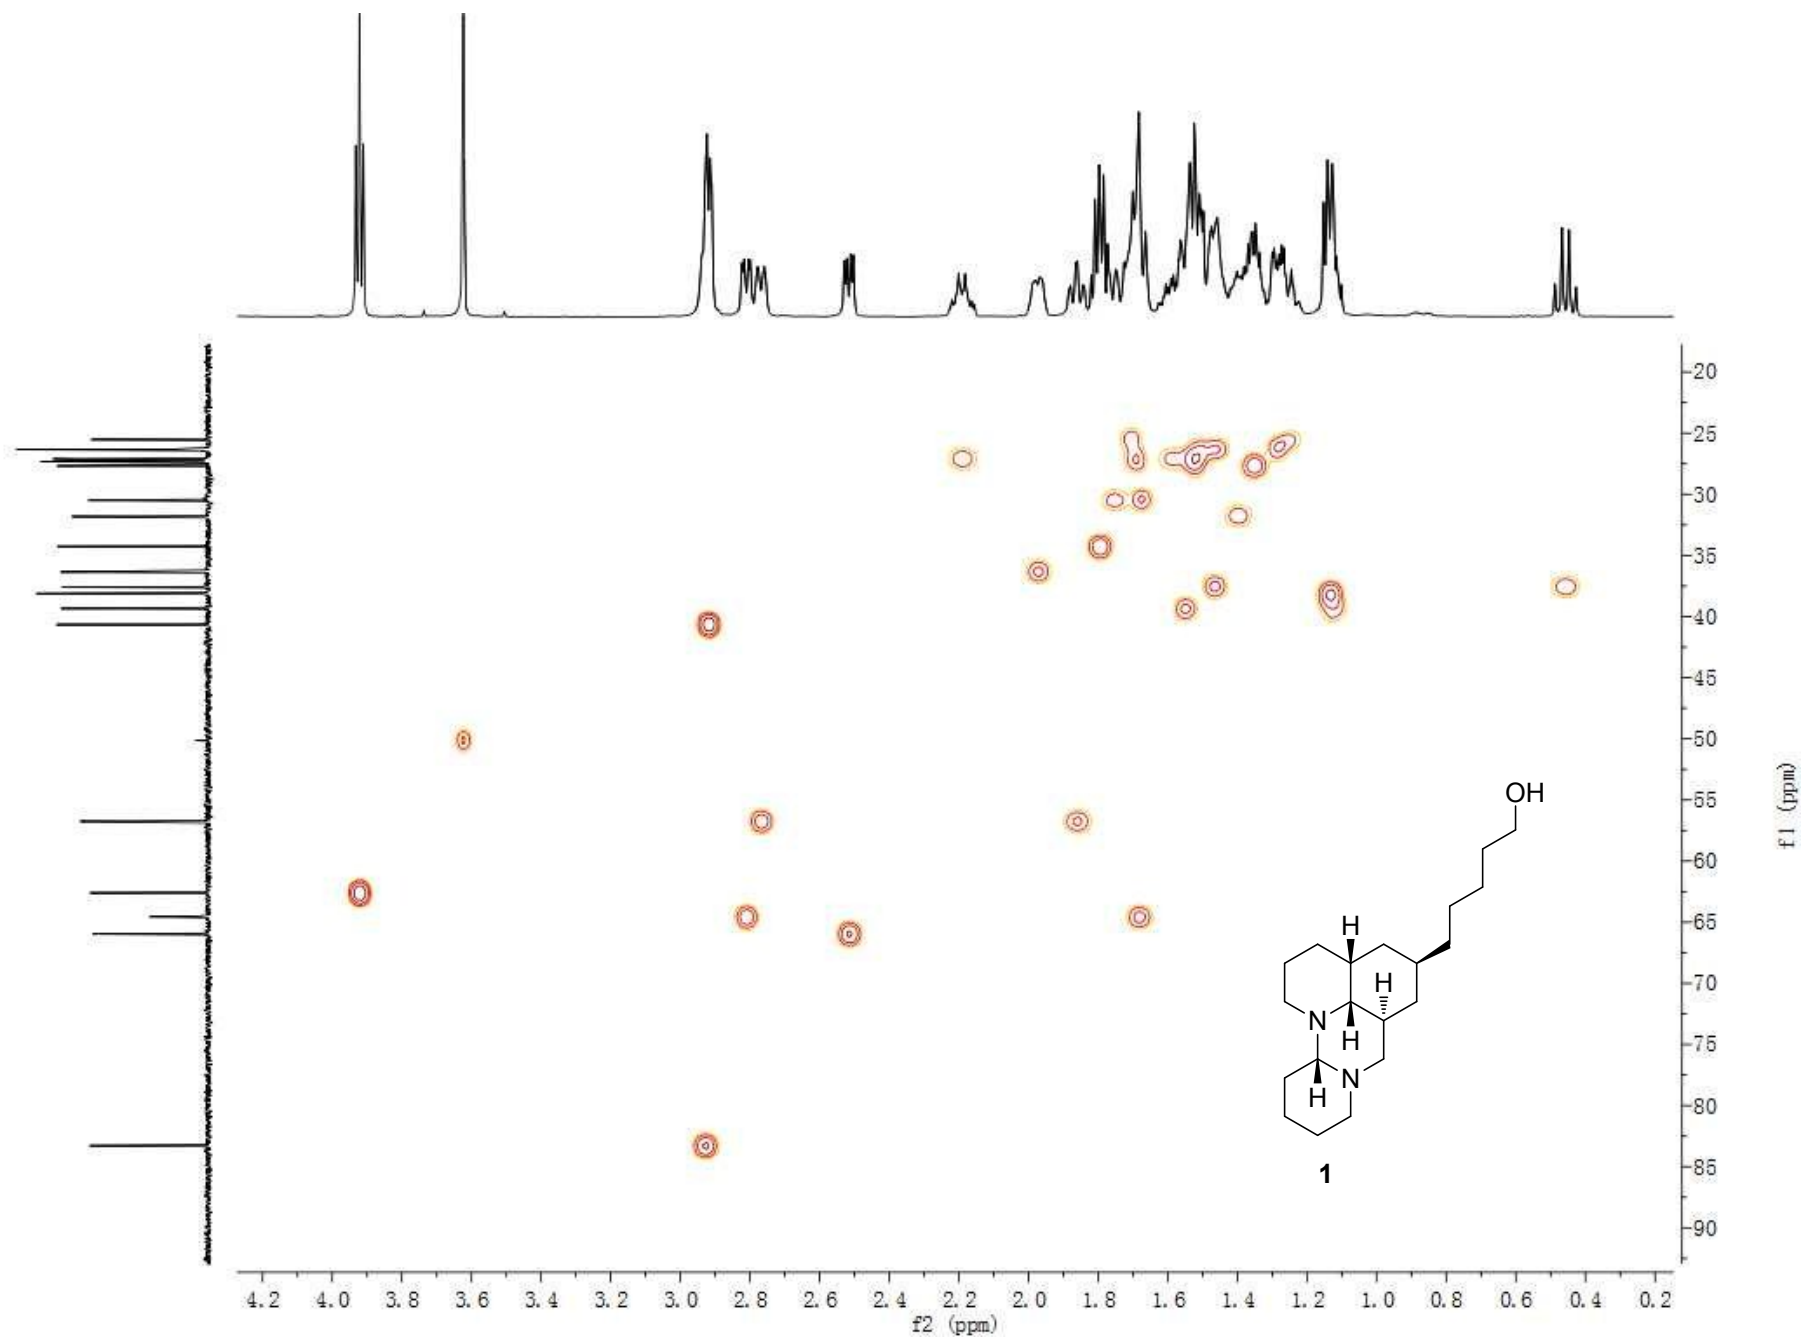

S1.4 COSY spectrum of schoberine B (1) in pyridine-*d*<sub>5</sub> at 313K

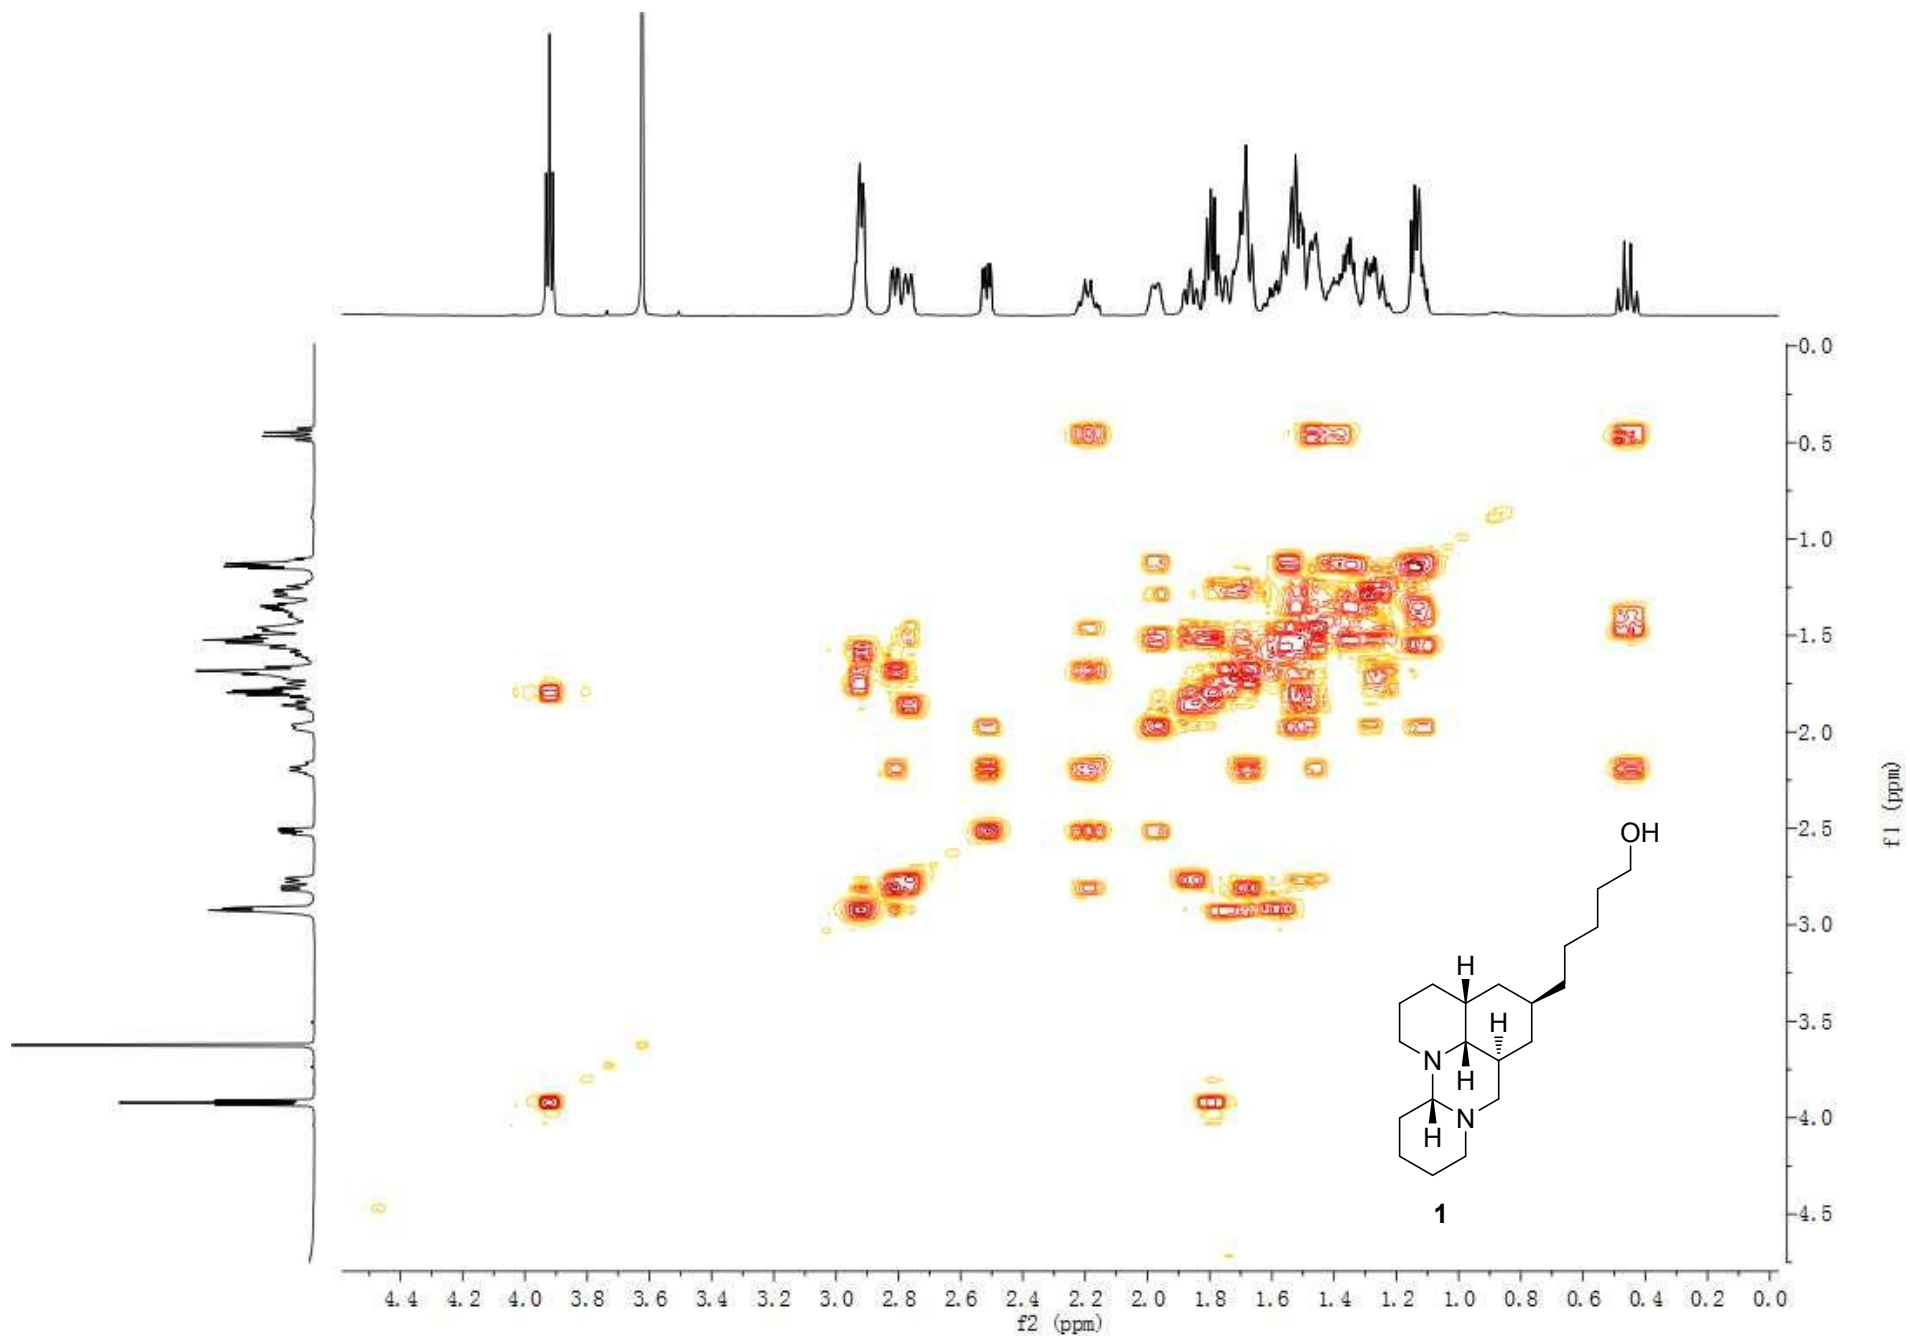

S1.5 HMBC spectrum of schoberine B (**1**) in pyridine-*d*<sub>5</sub> at 313K

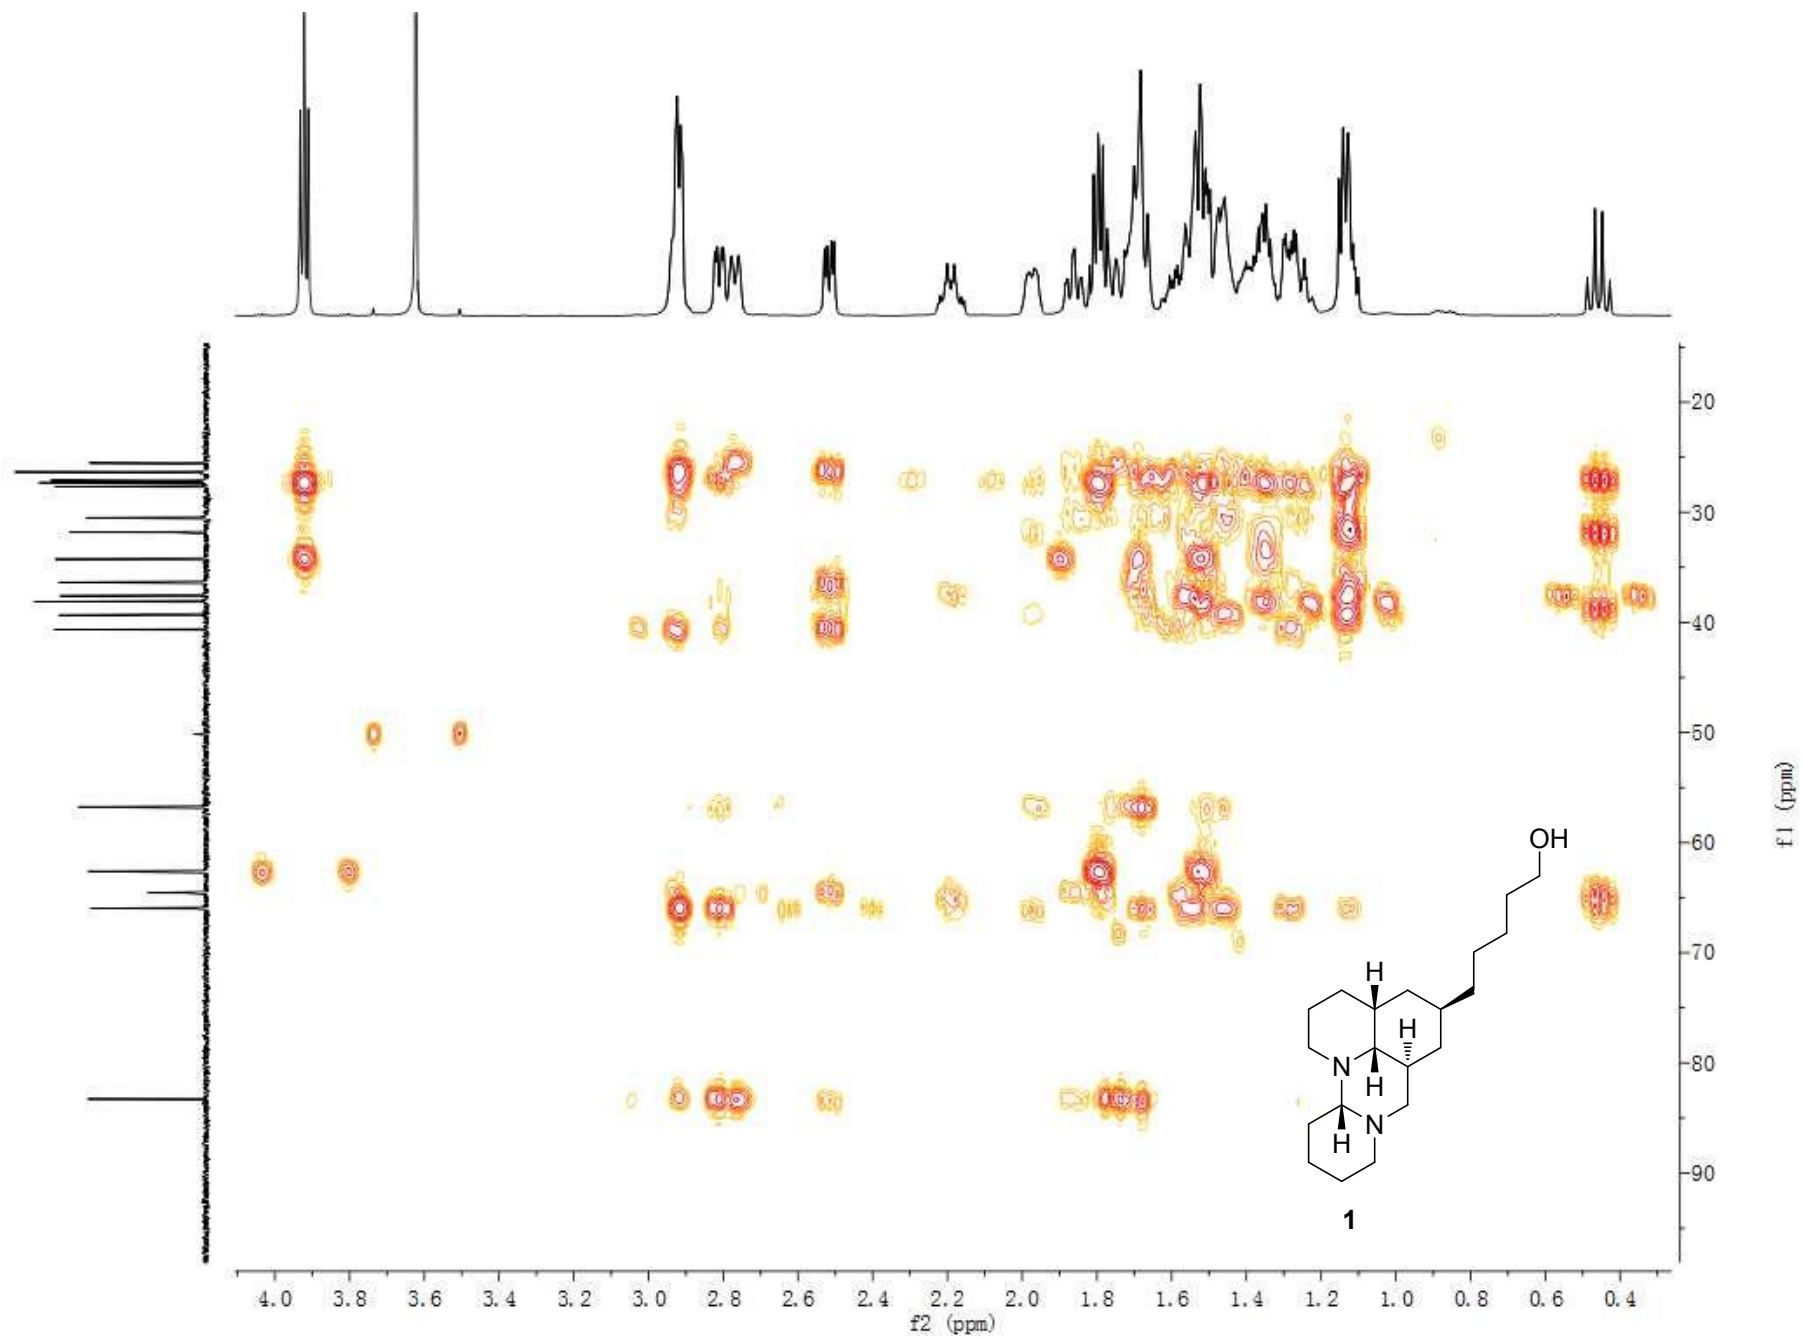

S1.6 ROESY spectrum of schoberine B (**1**) in pyridine-*d*<sub>5</sub> at 313K

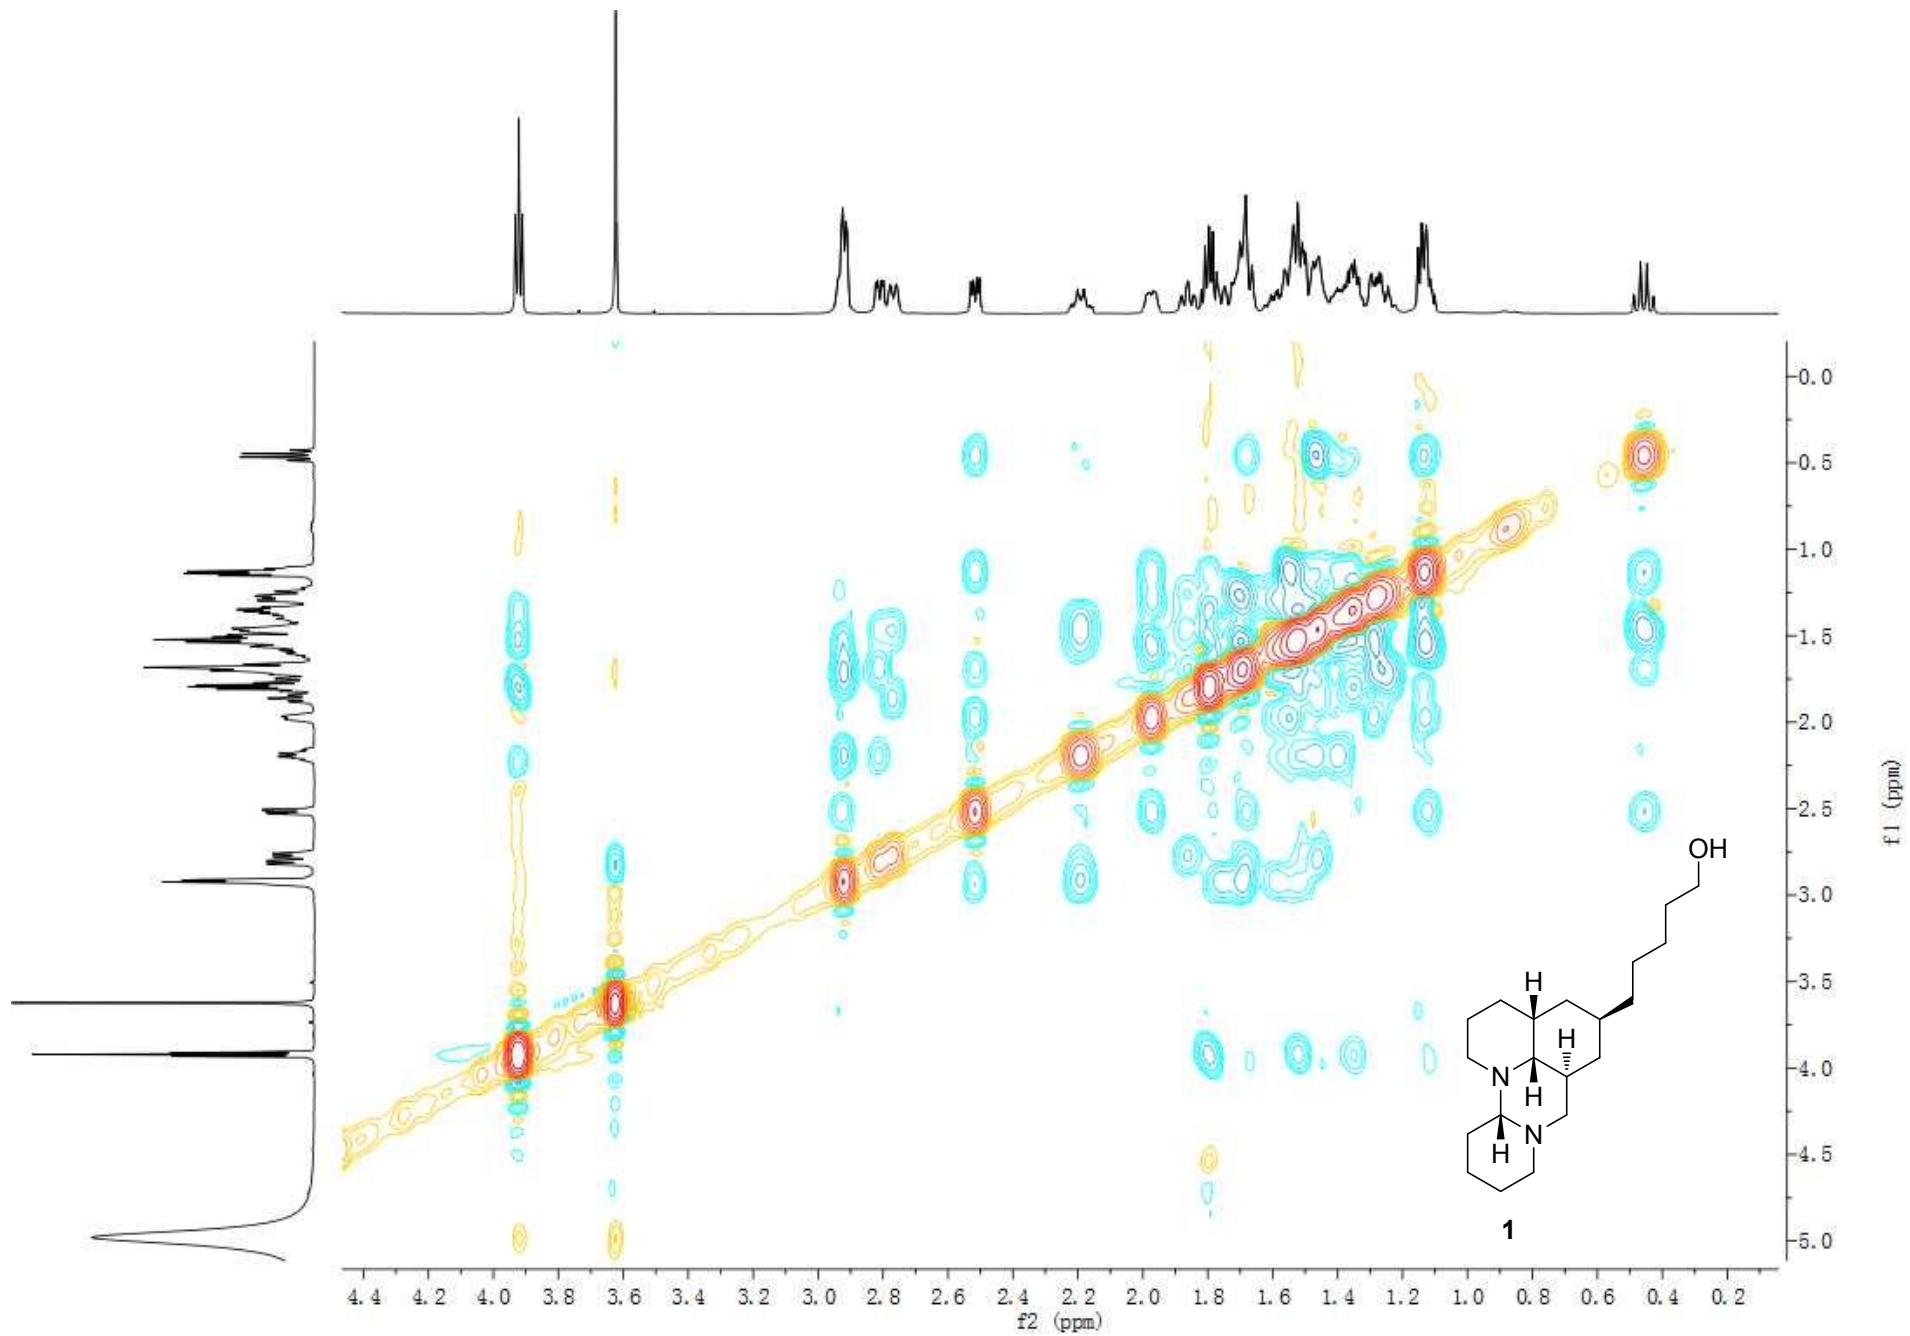



# S1.7 ESIMS and HREIMS spectrums of schoberine B (1)

## Mass Spectrum List Report

### Analysis Info

Analysis Name D:\DATA\2012file\1204\120419\hm900.d  
 Method ms\_ptservice.m  
 Sample Name hm9

Acquisition Date 4/19/2012 11:26:55 AM

Operator Bruker  
 Instrument HCT

### Acquisition Parameter

|                   |             |              |           |                          |          |
|-------------------|-------------|--------------|-----------|--------------------------|----------|
| Ion Source Type   | ESI         | Ion Polarity | Positive  | Alternating Ion Polarity | off      |
| Mass Range Mode   | Ultra Scan  | Scan Begin   | 100 m/z   | Scan End                 | 1000 m/z |
| Capillary Exit    | 166.0 Volt  | Skimmer      | 40.0 Volt | Trap Drive               | 50.0     |
| Accumulation Time | 367 $\mu$ s | Averages     | 5 Spectra | Auto MS/MS               | off      |

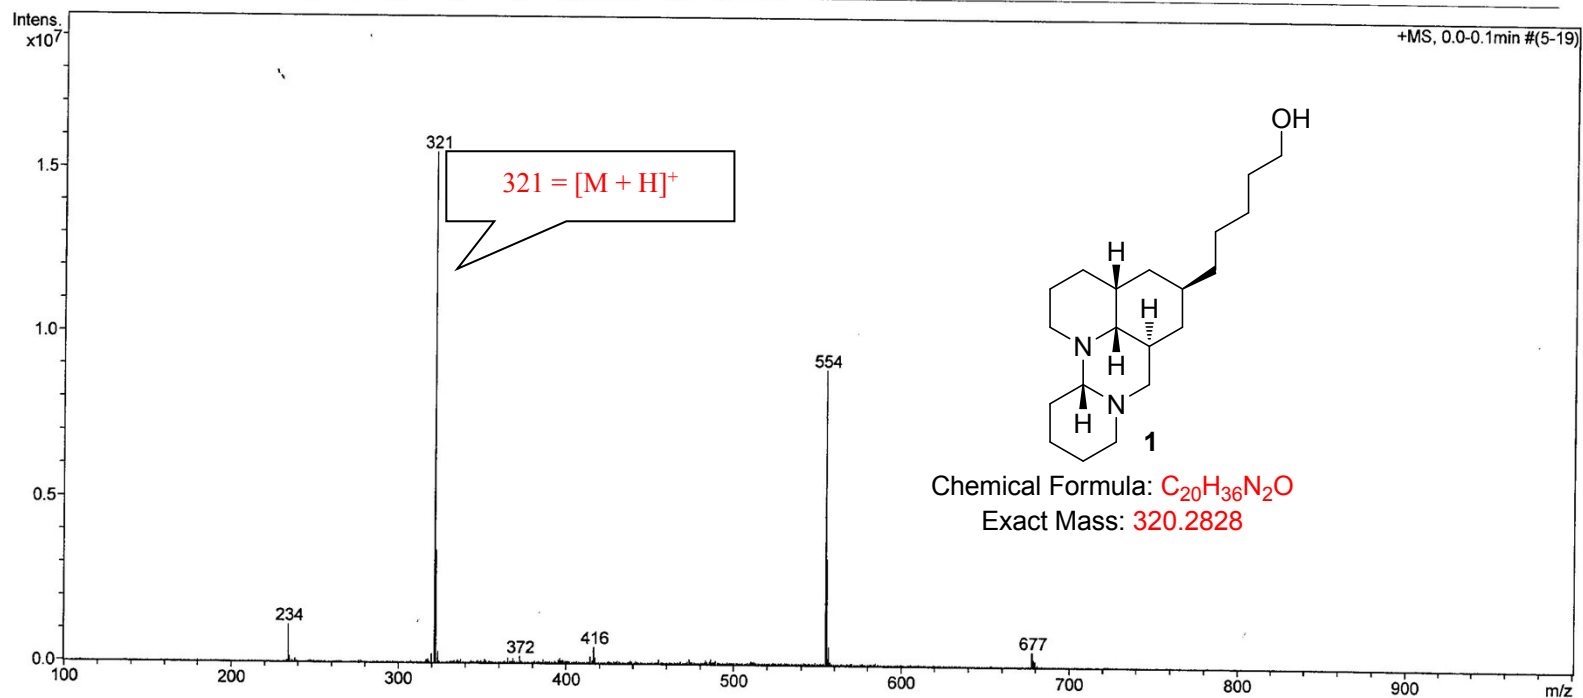

## Elemental Composition Report

### Single Mass Analysis

Tolerance = 10.0 PPM / DBE: min = -10.0, max = 120.0

Selected filters: None

Monoisotopic Mass, Odd and Even Electron Ions

22 formula(e) evaluated with 1 results within limits (up to 51 closest results for each mass)

Elements Used:

C: 0-200 H: 0-400 N: 2-2 O: 0-3

hm-9b

09:50:51 12-Jun-2012

Voltage EI+

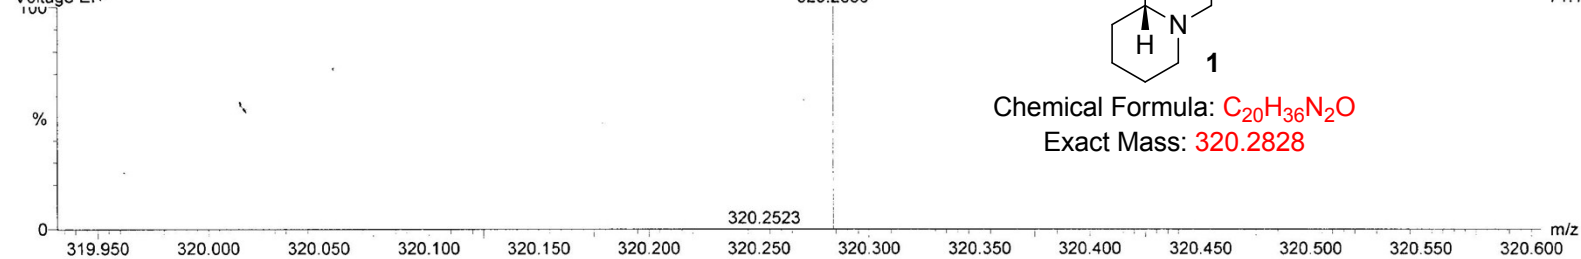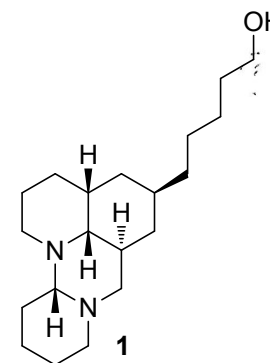

Autospec Premier  
P776  
71.1

Chemical Formula:  $C_{20}H_{36}N_2O$

Exact Mass: 320.2828

Minimum: -10.0  
Maximum: 100.0 10.0 120.0

| Mass     | Calc. Mass | mDa | PPM | DBE | i-FIT     | Formula      |
|----------|------------|-----|-----|-----|-----------|--------------|
| 320.2836 | 320.2828   | 0.8 | 2.5 | 4.0 | 5546050.0 | C20 H36 N2 O |

S1.8 IR spectrum of schoberine B (1)

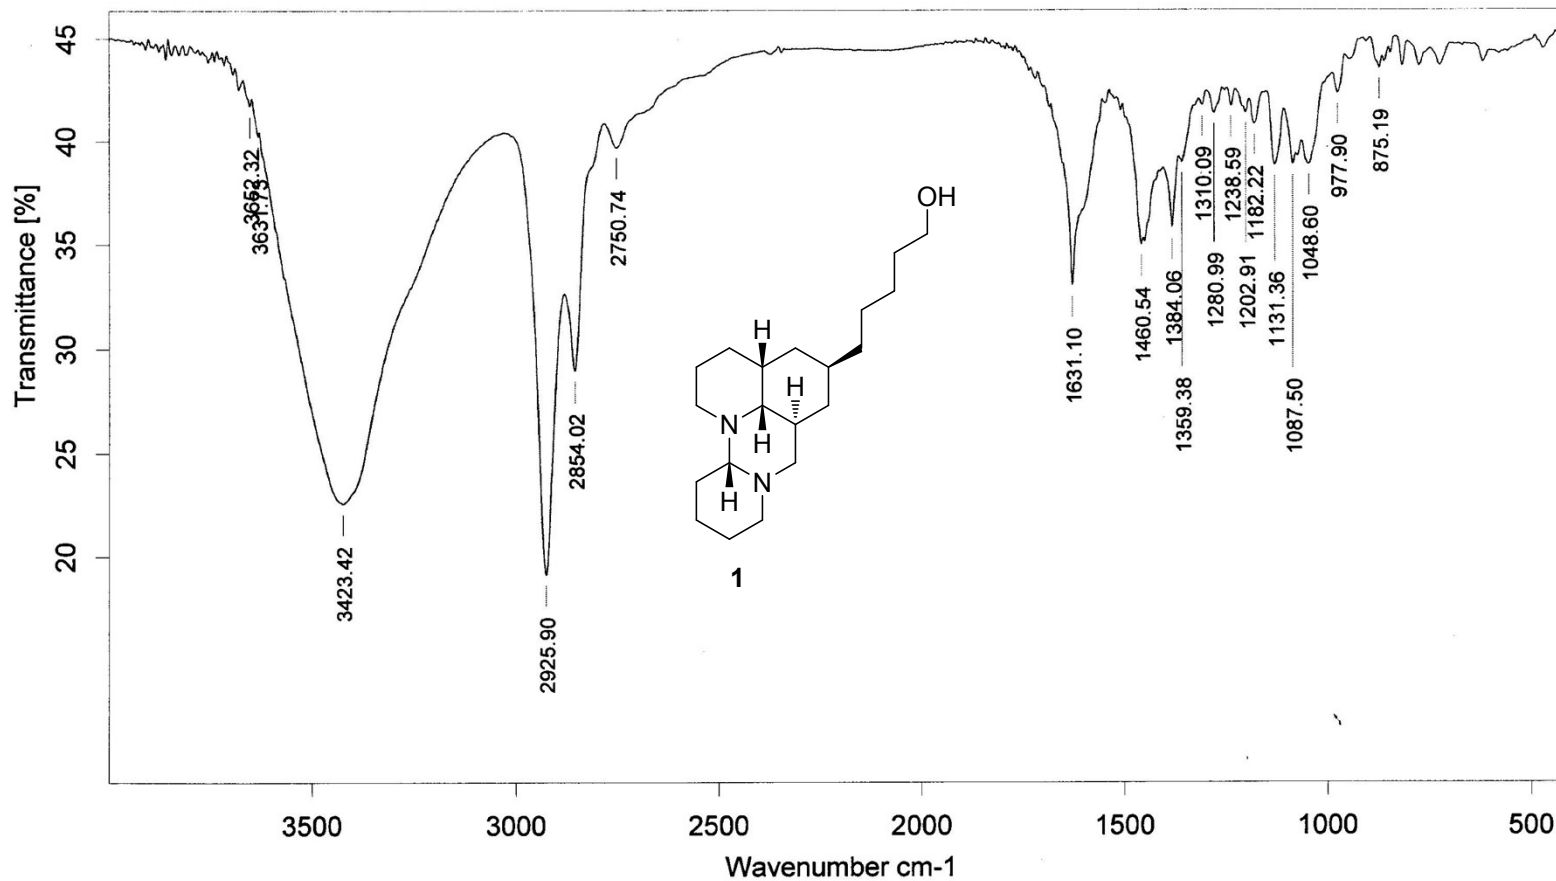

|                      |                 |                                     |  |                          |  |
|----------------------|-----------------|-------------------------------------|--|--------------------------|--|
| Sample : hm-9b       |                 | Frequency Range : 399.246 - 3996.32 |  | Measured on : 05/07/2012 |  |
| Technique : KBr压片    | Resolution : 4  | Instrument : Tensor27               |  | Sample Scans : 16        |  |
| Customer : 120705IR0 | Zerofilling : 2 | Acquisition : Double Sided, For     |  |                          |  |

S2.1  $^1\text{H}$  NMR spectrum of myriberine B (**2**) in methanol- $d_4$  at 313K

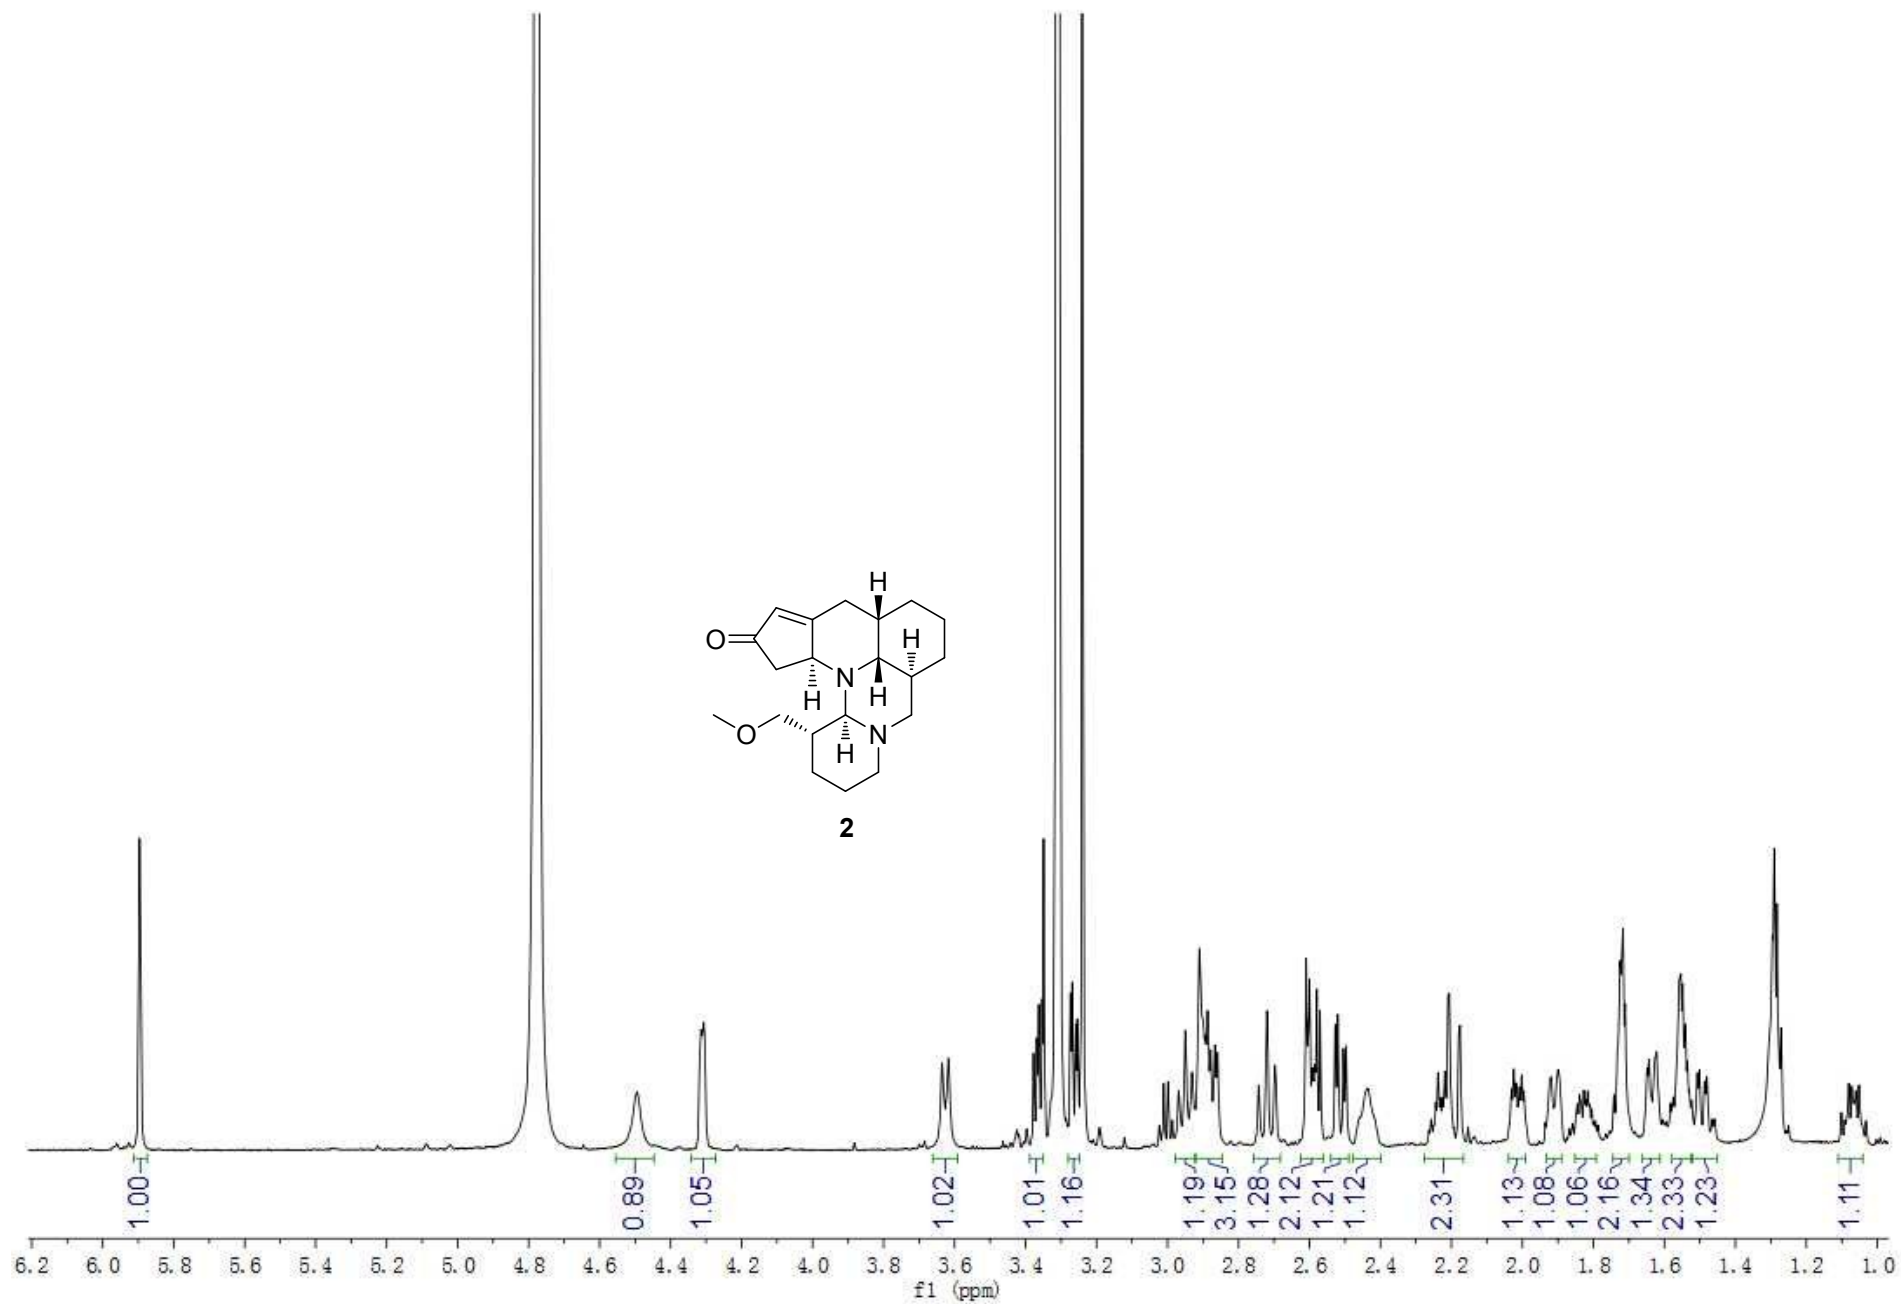

S2.2  $^{13}\text{C}$  NMR spectrum of myriberine B (**2**) in methanol- $d_4$  at 313K

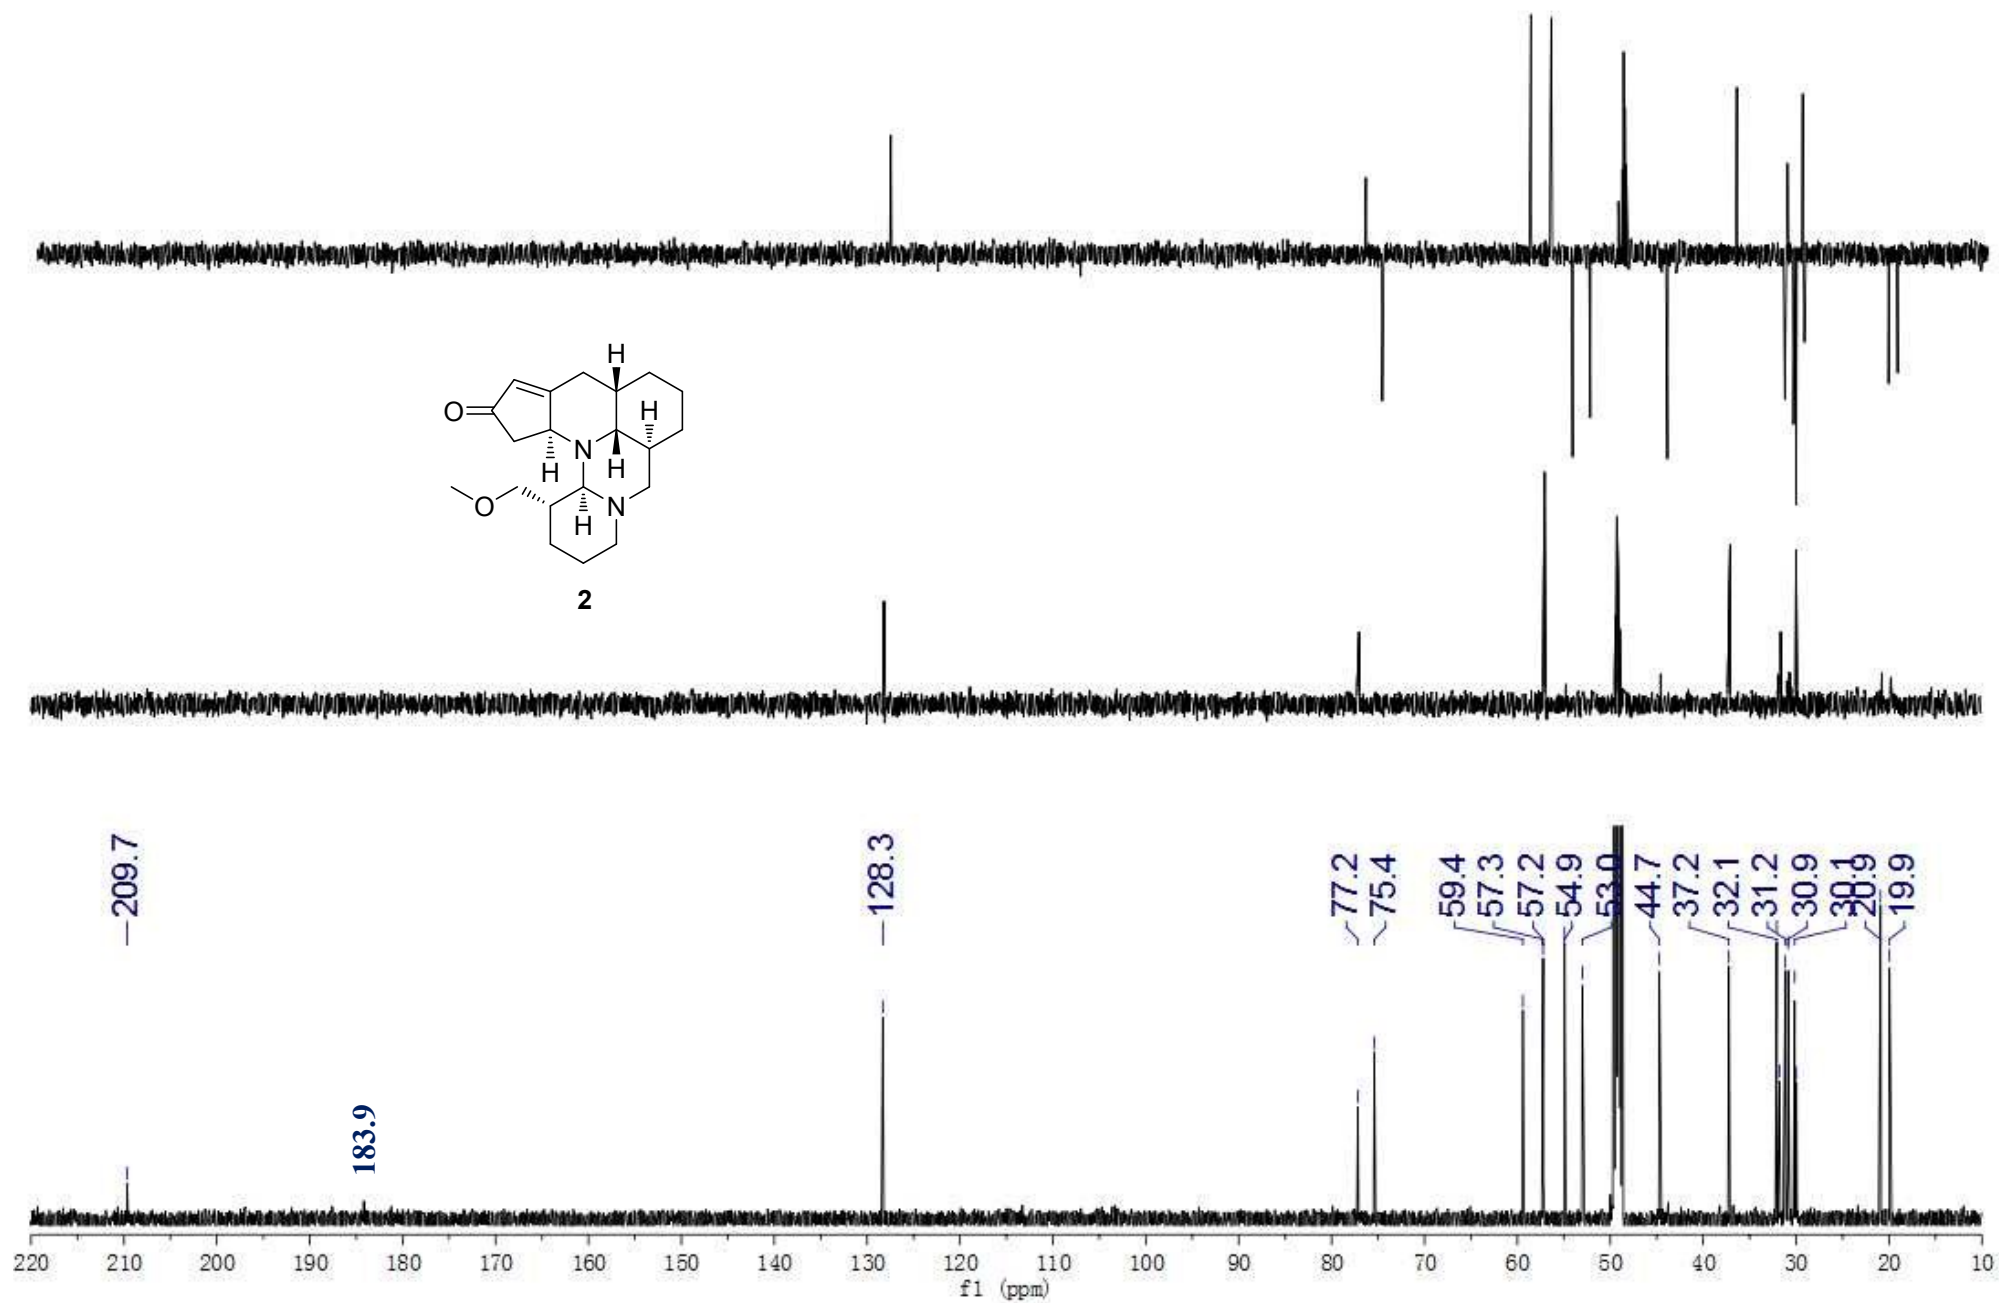

S2.3 HSQC spectrum of myriberine B (**2**) in methanol-*d*<sub>4</sub> at 313K

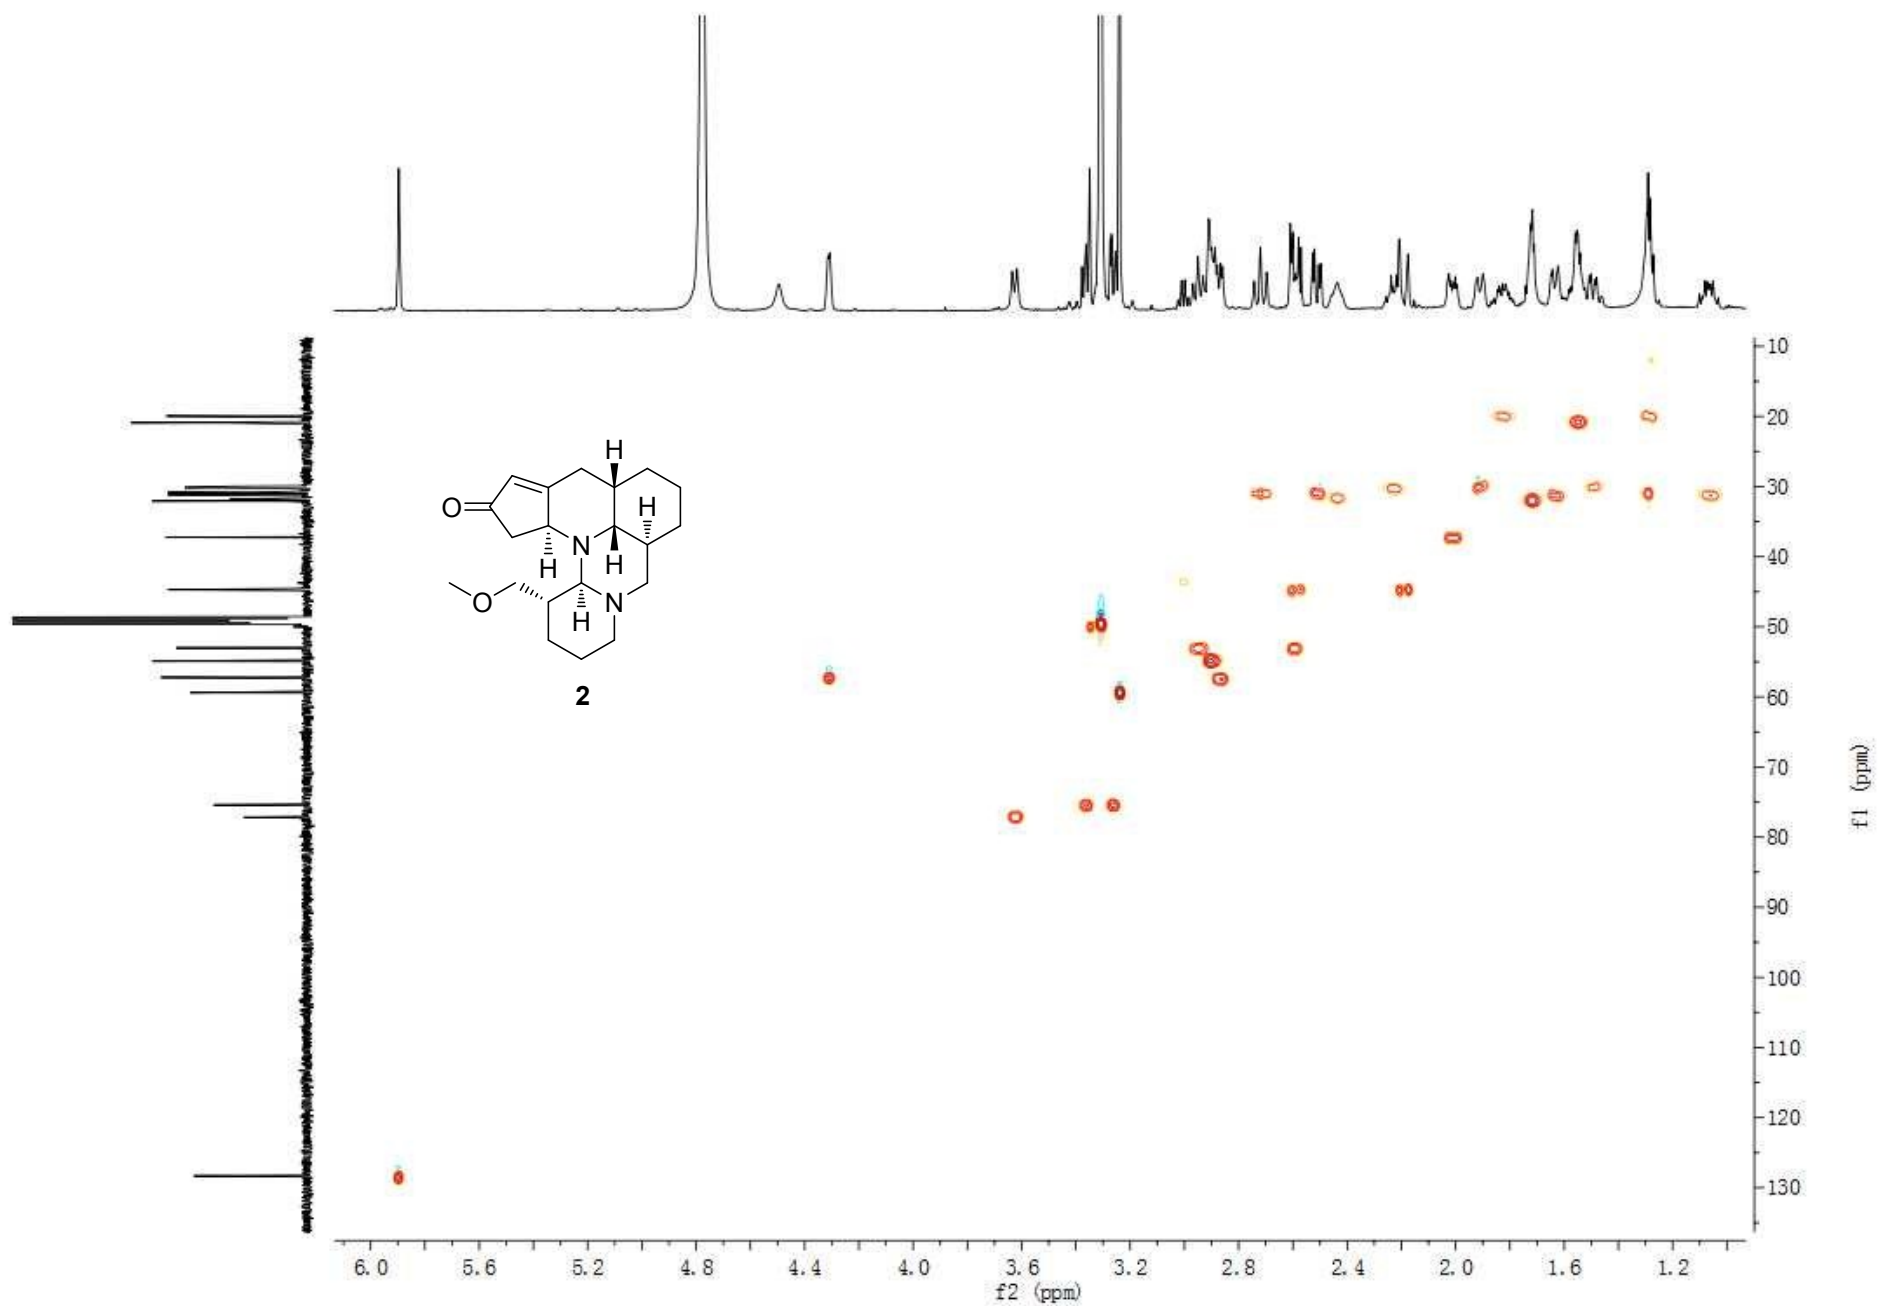

S2.4 COSY spectrum of myriberine B (**2**) in methanol-*d*<sub>4</sub> at 313K

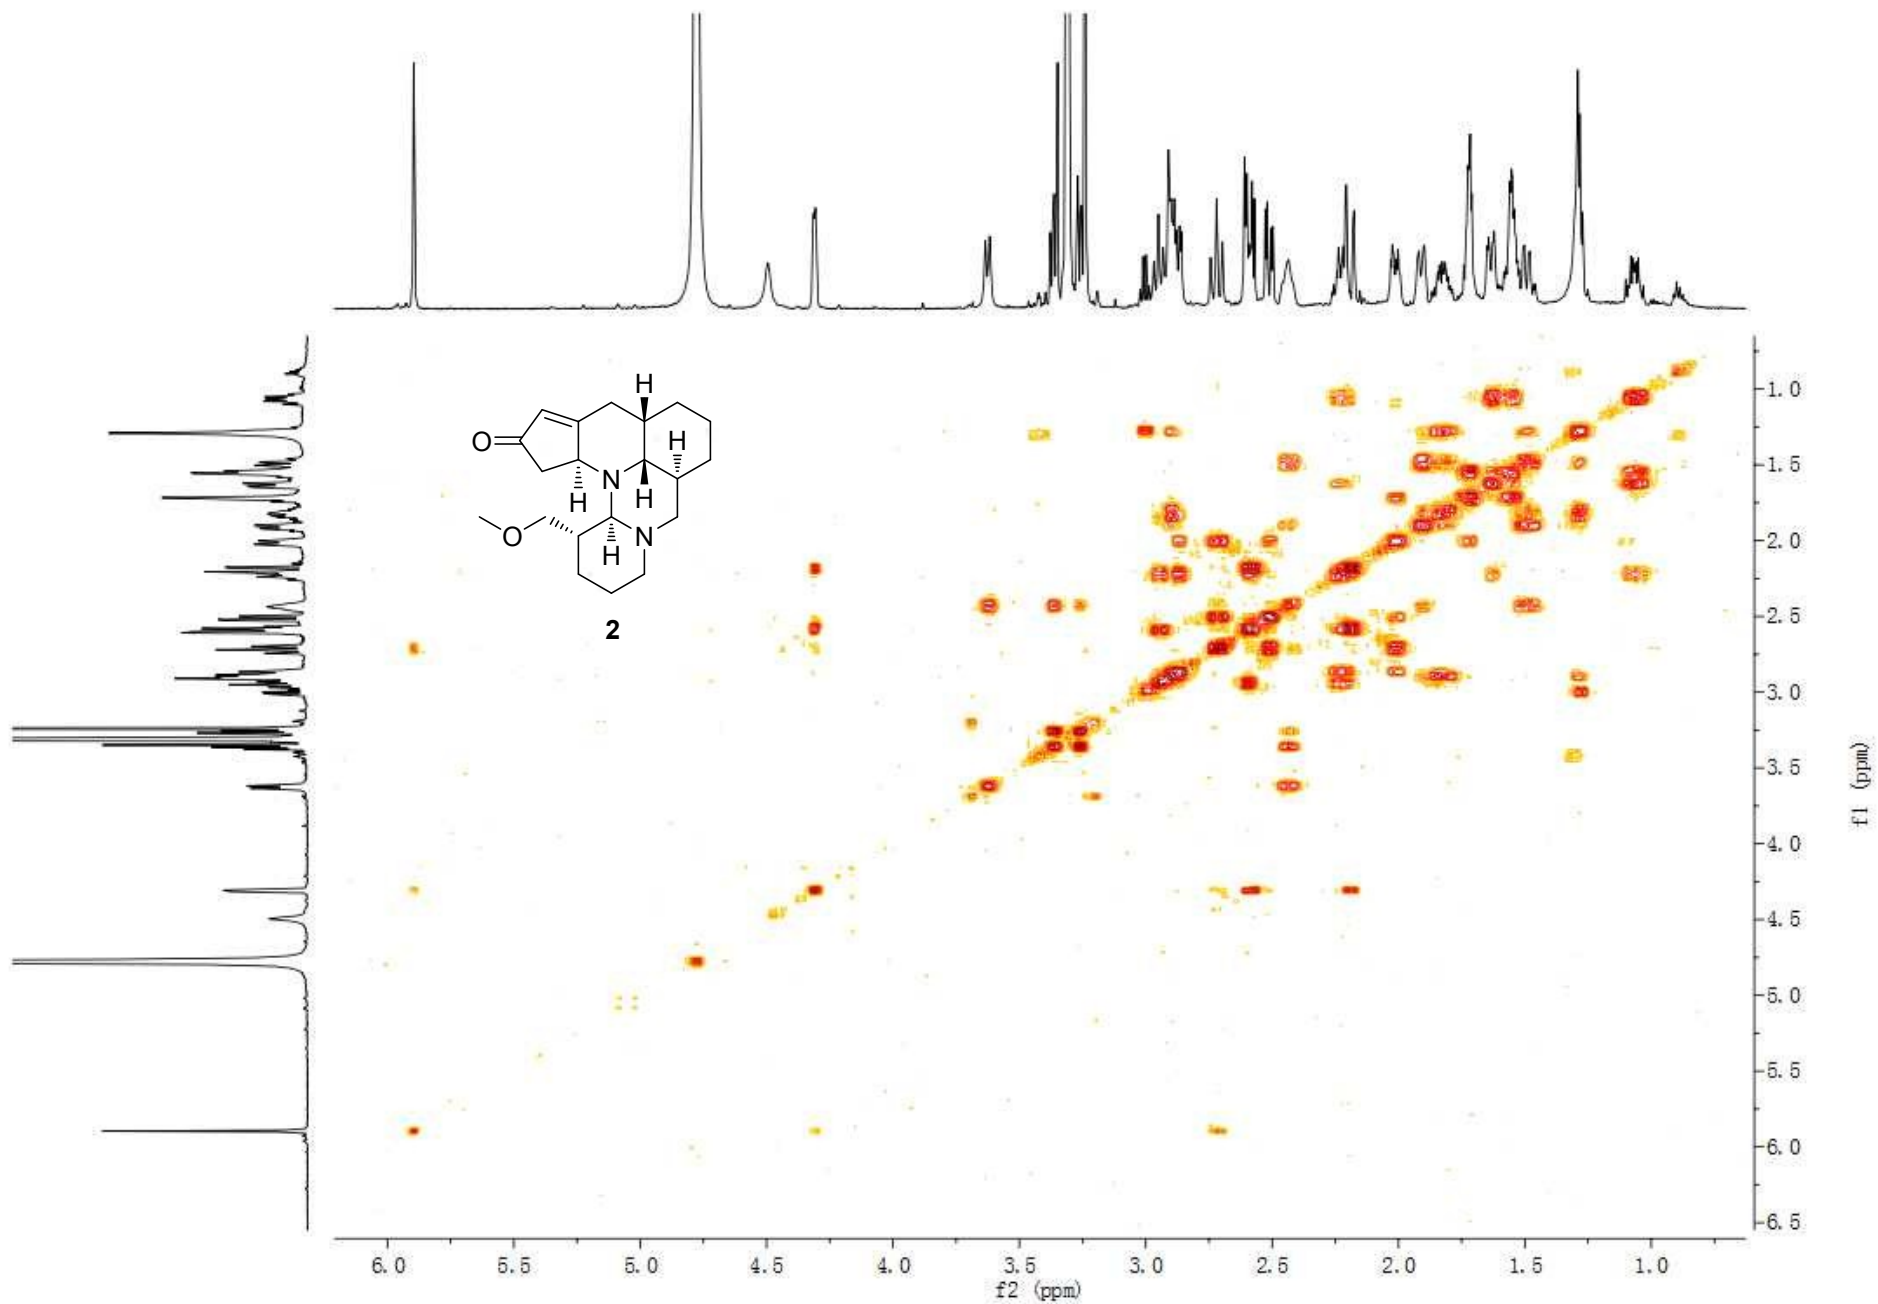

S2.5 HMBC spectrum of myriberine B (2) in methanol- $d_4$  at 313K

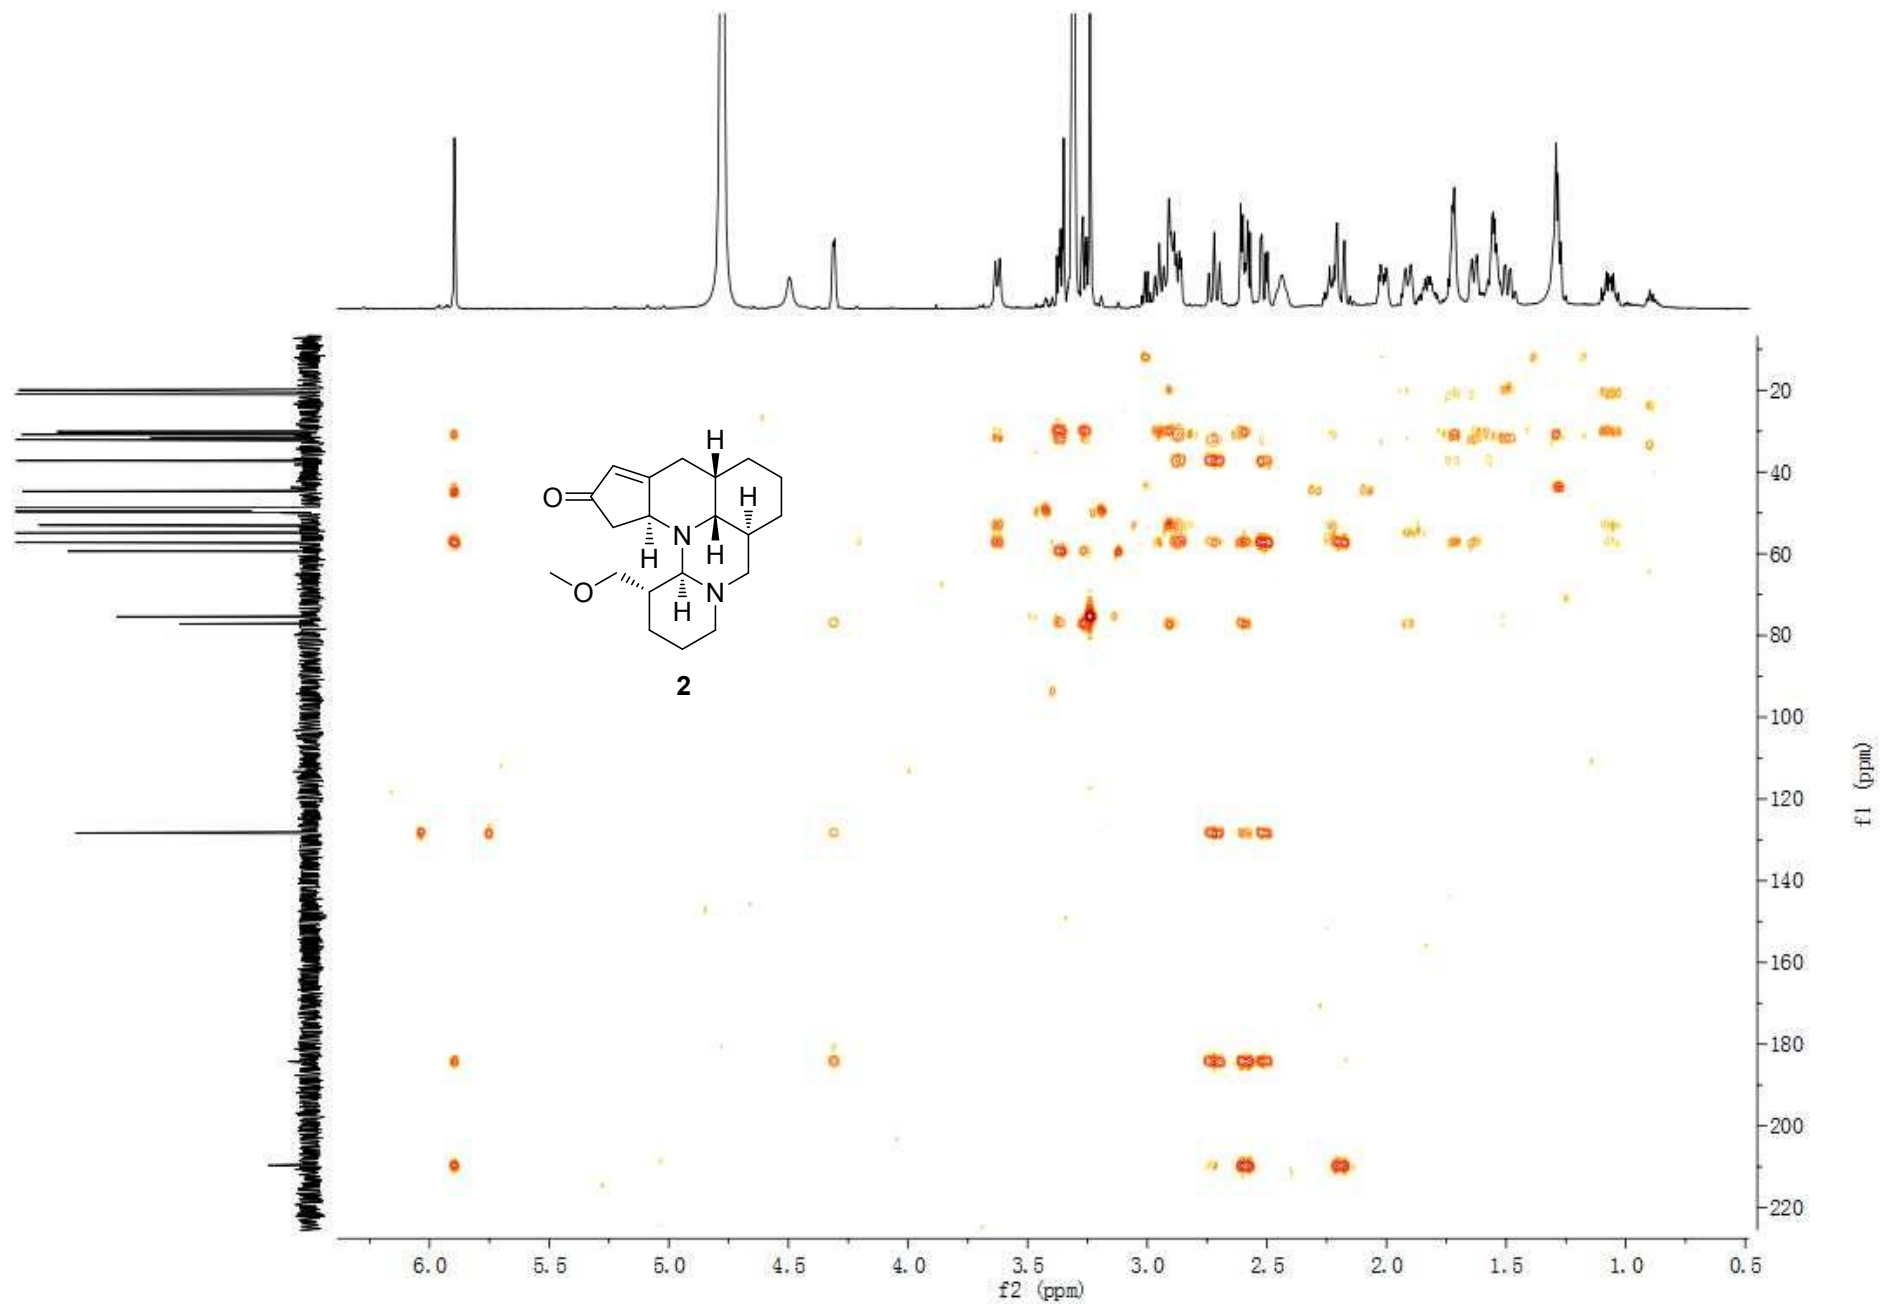



S2.6 ROESY spectrum of myriberine B (**2**) in methanol- $d_4$  at 313K

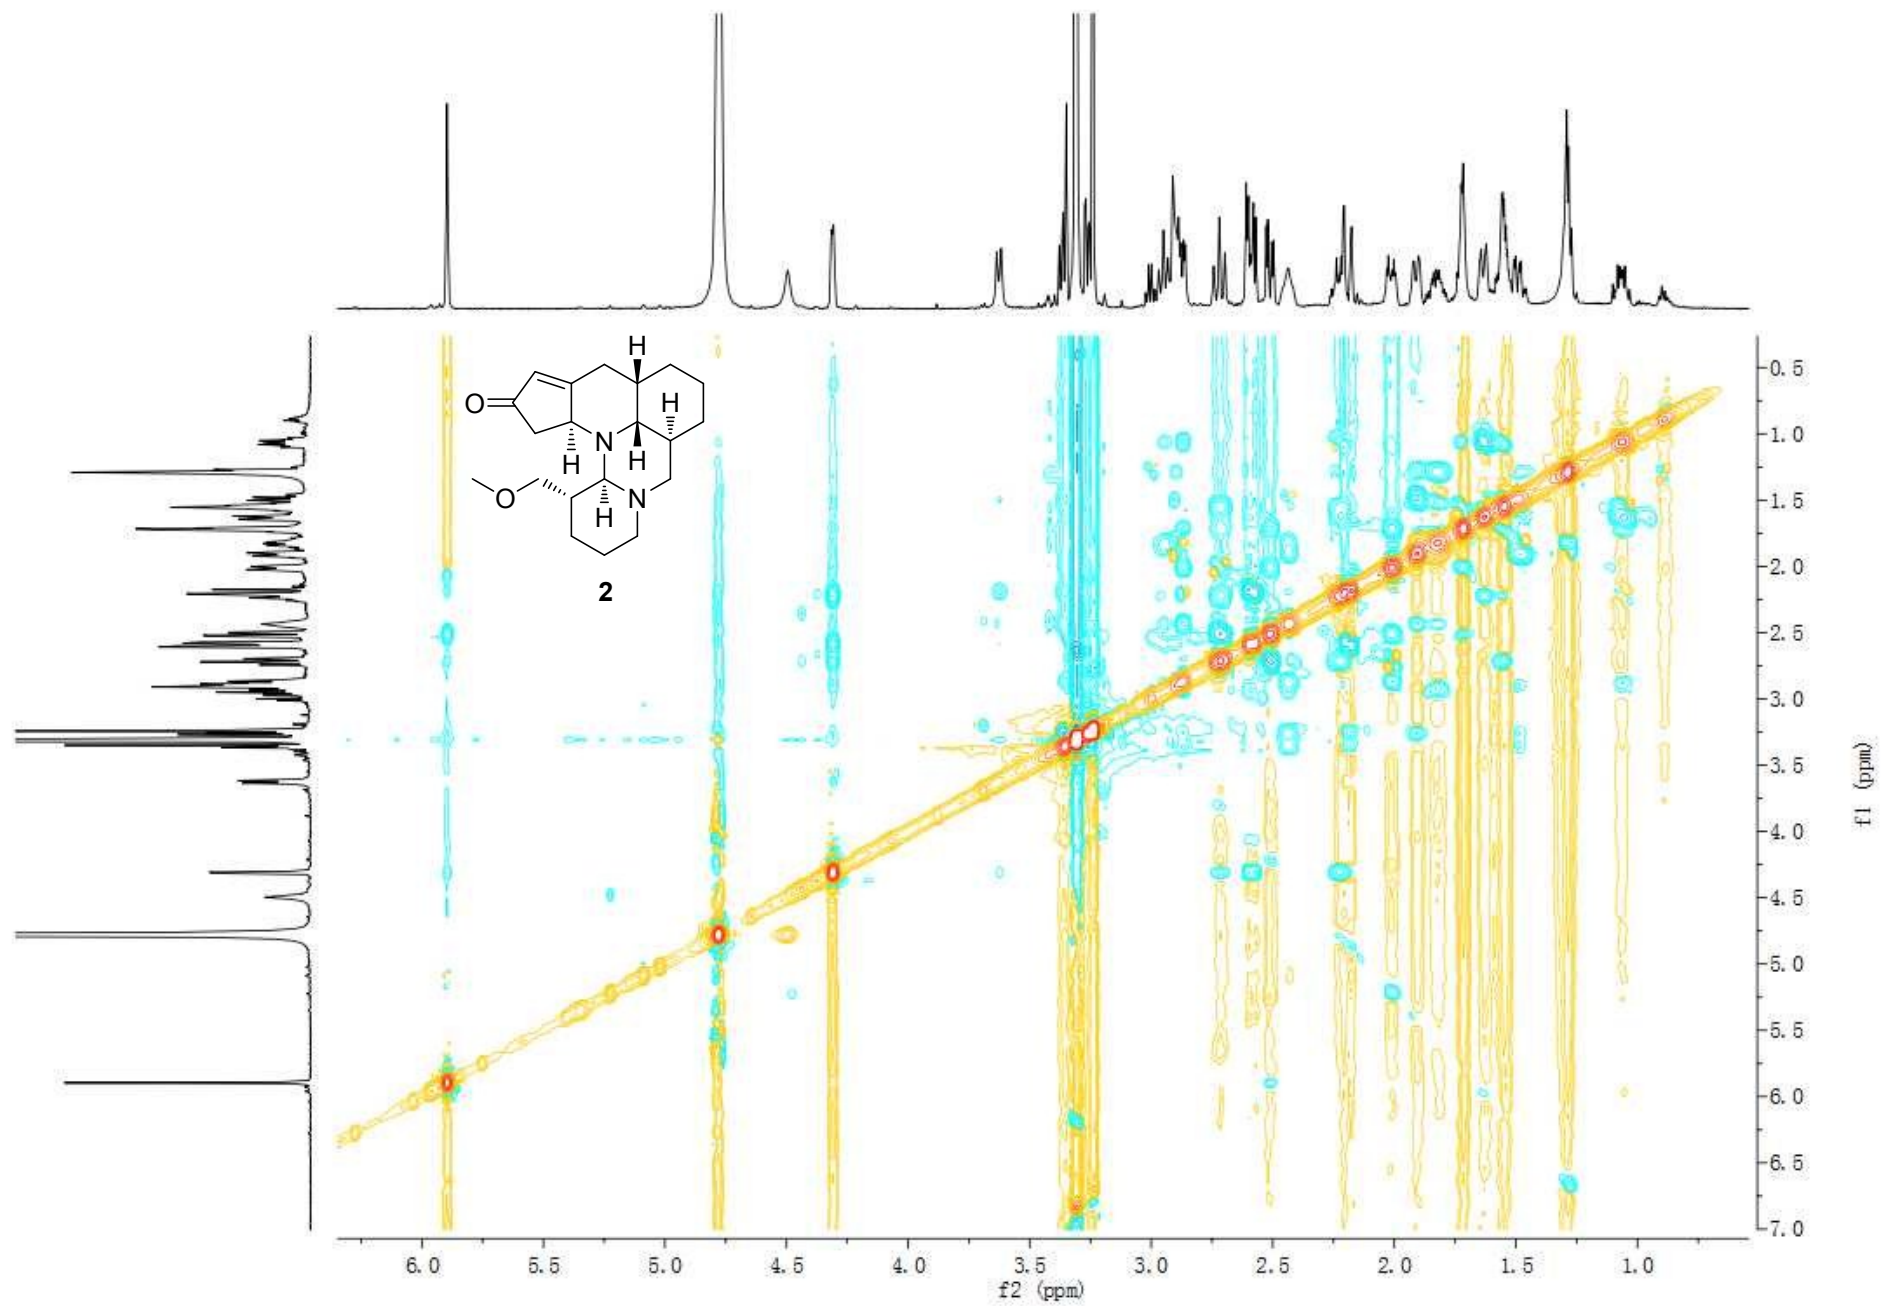

## S2.7 ESIMS and HREIMS spectrums of myriberine B (2)

### Mass Spectrum List Report

| Analysis Info         |                                        | Acquisition Date         |                      |
|-----------------------|----------------------------------------|--------------------------|----------------------|
| Analysis Name         | D:\DATA\2012file\1204\120427\hm-5100.d | Acquisition Date         | 4/26/2012 4:06:54 PM |
| Method                | ms_ptservice.m                         | Operator                 | Bruker               |
| Sample Name           | hm-51                                  | Instrument               | HCT                  |
| Acquisition Parameter |                                        |                          |                      |
| Ion Source Type       | ESI                                    | Ion Polarity             | Positive             |
| Mass Range Mode       | Ultra Scan                             | Scan Begin               | 100 m/z              |
| Capillary Exit        | 180.0 Volt                             | Skimmer                  | 40.0 Volt            |
| Accumulation Time     | 1062 $\mu$ s                           | Averages                 | 5 Spectra            |
|                       |                                        | Alternating Ion Polarity | off                  |
|                       |                                        | Scan End                 | 800 m/z              |
|                       |                                        | Trap Drive               | 45.0                 |
|                       |                                        | Auto MS/MS               | off                  |

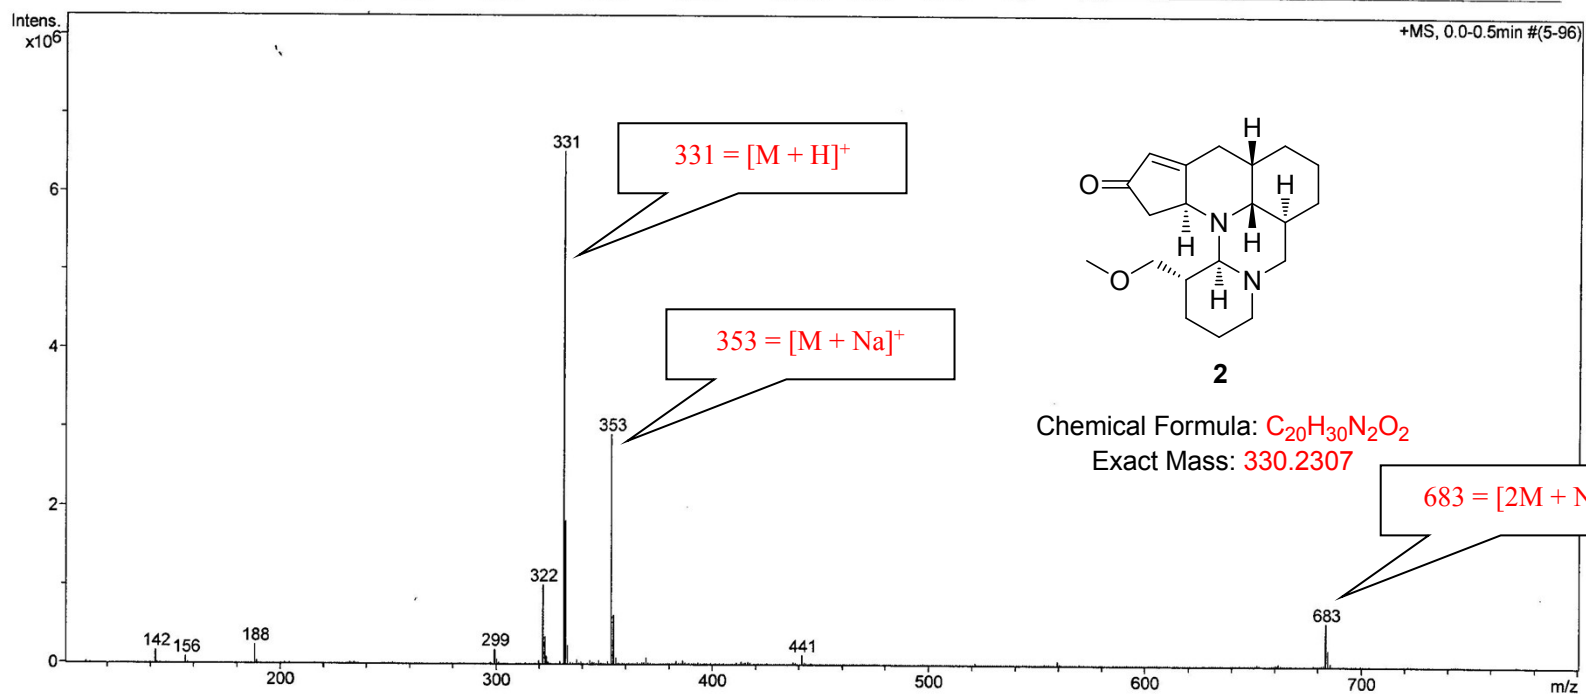

## Elemental Composition Report

Page 1

### Single Mass Analysis

Tolerance = 10.0 PPM / DBE: min = -10.0, max = 120.0

Selected filters: None

Monoisotopic Mass, Odd and Even Electron Ions

22 formula(e) evaluated with 1 results within limits (up to 51 closest results for each mass)

Elements Used:

C: 0-200 H: 0-400 N: 2-2 O: 0-3

hm-51

09:45:29 12-Jun-2012

Voltage El+

KIB

M120612EA-02AFAMM 13 (1.194)

330.2300

Autospec Premier

P776

60.2

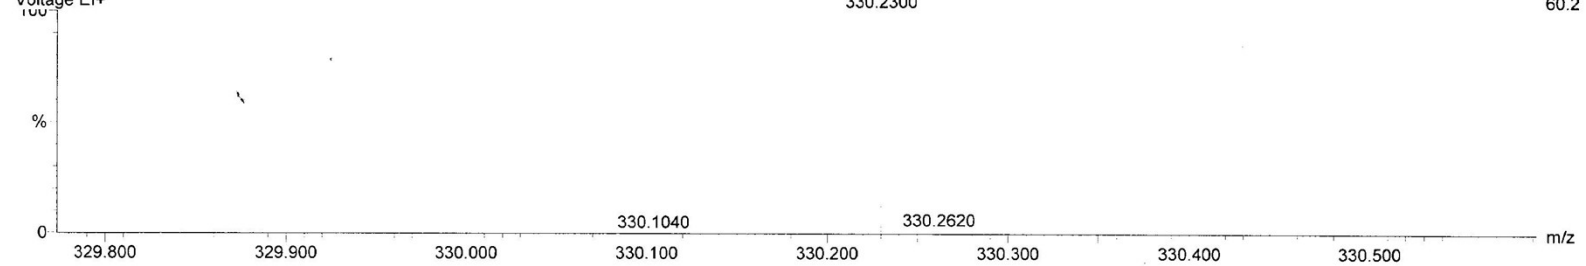

Minimum: -10.0  
Maximum: 100.0 10.0 120.0

| Mass     | Calc. Mass | mDa  | PPM  | DBE | i-FIT     | Formula       |
|----------|------------|------|------|-----|-----------|---------------|
| 330.2300 | 330.2307   | -0.7 | -2.1 | 7.0 | 5546045.0 | C20 H30 N2 O2 |

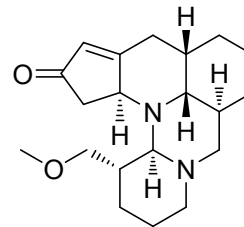

2

Chemical Formula:  $C_{20}H_{30}N_2O_2$

Exact Mass: 330.2307

S2.8 IR spectrum of myriberine B (2)

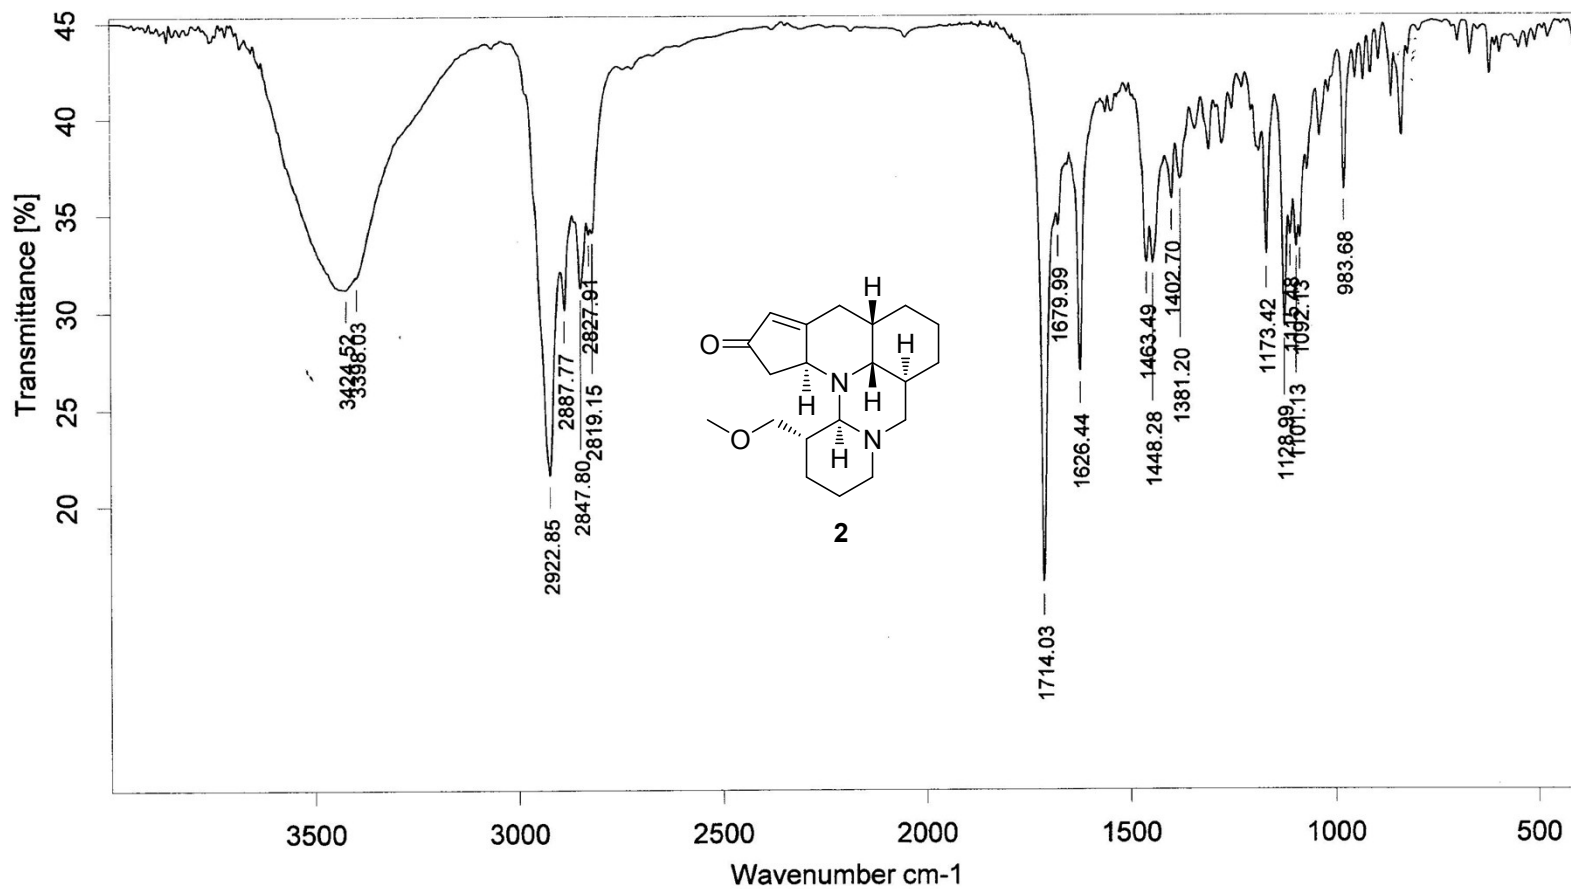

|                       |                 |                                     |                          |
|-----------------------|-----------------|-------------------------------------|--------------------------|
| Sample : hm-51        |                 | Frequency Range : 399.246 - 3996.32 | Measured on : 26/06/2012 |
| Technique : KBr压片     | Resolution : 4  | Instrument : Tensor27               | Sample Scans : 16        |
| Customer : 120626IR18 | Zerofilling : 2 | Acquisition : Double Sided,For      |                          |

S2.9 ECD spectrum of myriberine B (2) in methanol

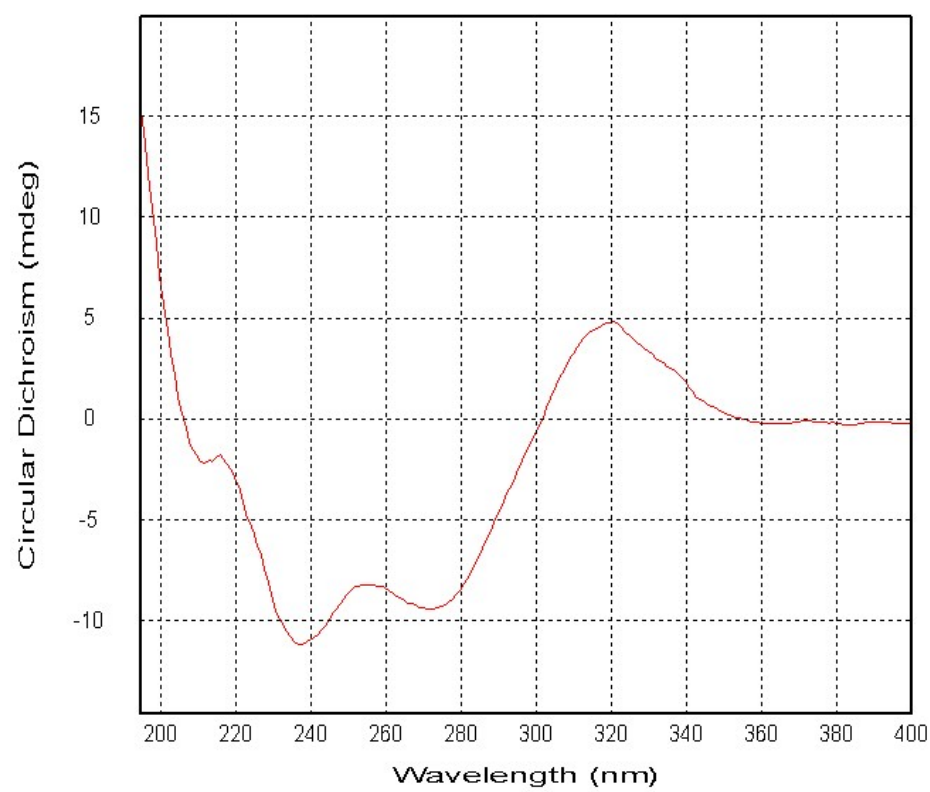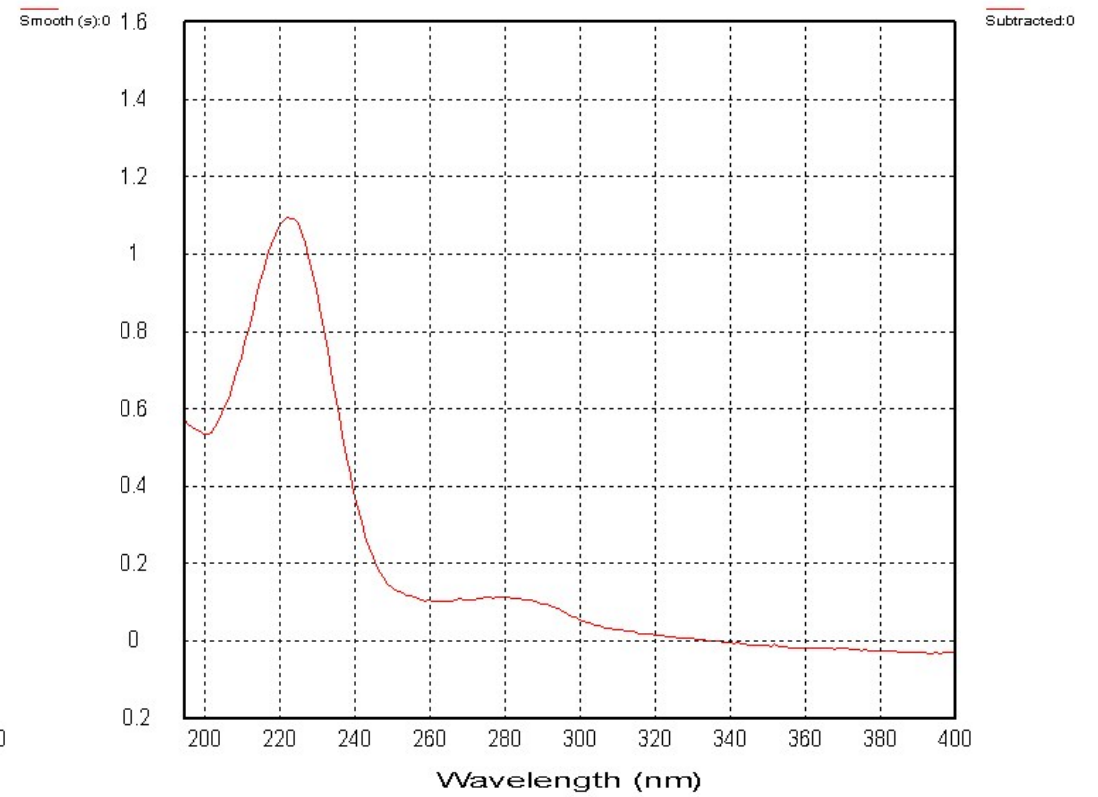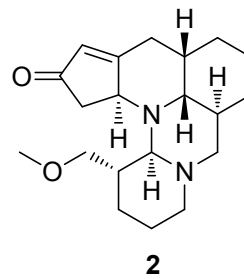

## EXPERIMENTAL SECTION

**General Experimental Procedures.** Optical rotations were measured with a Jasco P-1020 polarimeter. UV spectra were obtained using a Shimadzu UV-2401A spectrophotometer. ECD spectra were recorded with an Applied Photophysics Chirascan spectrometer. A Tenor 27 spectrophotometer was used for the recording of IR spectra as KBr pellets. 1D and 2D NMR spectra were recorded using Bruker AVANCEIII-600 spectrometer. HREIMS was performed with an API QSTAR time-of-flight spectrometer. Semi-preparative HPLC was performed using an Agilent 1100 liquid chromatograph with a Waters X-Bridge C18 (4.6×250 mm) column. Detectors for HPLC analysis applied DAD and ELSD. Column chromatography (CC) was performed using silica gel (200-300 mesh and 300-400 mesh, Qingdao Marine Chemical, Inc., Qingdao, P. R. China).

**Plant Material.** The aerial parts of *M. faberi* were collected in October 2011 from Sichuan Province, the People's Republic of China, after its flowering phase. The plant samples were identified by Prof. Xun Gong of the State Key Laboratory of Phytochemistry and Plant Resource in West China, Kunming Institute of Botany (KIB), Chinese Academy of Sciences (CAS). A voucher specimen was deposited at KIB, CAS under the accession number KIB H20111001.

**Extraction and Isolation.** The air-dried, powdered leaves and stems (30 kg) of *M. faberi* were extracted three times with 50 L of 95% EtOH. After removing saccharides using a macroporous resin (D101), the crude alkaloids (223 g) were subjected to normal-phase silica gel chromatography (200-300 mesh; CHCl<sub>3</sub>/MeOH, 20:1→0:1), yielding four fractions (Fr 1-4). Fraction 1 (Fr 1, 12.9 g) was further subjected to normal-phase Si gel (200-300 mesh; PE/EtOAc = 5:1) to give Fr. 1A-1C. Fr. 1C was separated using two steps of normal-phase Si gel and then subjected to a Waters X-Bridge C<sub>18</sub> column (4.6×250 mm) (MeCN/H<sub>2</sub>O = 60:40) to give **2** (2 mg). Fraction 2 (Fr 2, 32.4 g) was subjected to

normal-phase Si gel (200-300 mesh; PE/EtOAc = 5:1) to yield four fractions (Fr 2A-2D). Fr 2C (1.9 g) was repeatedly purified on normal-phase Si gel, resulting in **1** (2 mg) after Waters X-Bridge C<sub>18</sub> (4.6×250 mm) chromatography (MeCN/H<sub>2</sub>O = 50:50). The retention time of **1** on HPLC was detected by evaporative light-scattering detector.

### **Bioassay.**

#### **Cells:**

Huh7.5 human liver cells (kindly provided by Vertex Pharmaceuticals, Boston, MA) were cultured in Dulbecco's Modified Eagle's Medium (DMEM, Invitrogen, CA) supplemented with 10% inactivated fetal bovine serum (Invitrogen) and 1% penicillin-streptomycin (Invitrogen). The cells were cultured at 37°C in air atmosphere (containing 5% CO<sub>2</sub>).

#### **HCV Infection and Treatment:**

The Huh7.5 cells were seeded into 96-well plates (Costar) at a density of  $3 \times 10^4$  cells/cm<sup>2</sup>; after 24 hrs, the cells were infected with HCV viral stock (chimeric HCV FL-J6/JFH/JC1, approximately 45 IU per cell) and simultaneously treated with compounds **1** and **2** or solvent as the control. The culture medium was removed at 72 hrs after inoculation, and intracellular RNA was extracted with RNeasy Mini Kit (Qiagen). The intracellular HCV RNA and internal control gene glyceraldehyde 3-phosphate dehydrogenase (GAPDH) were quantified using AgPath-ID™ One-Step RT-PCR Kit (Applied Biosystems). The results were calculated with  $2^{-\Delta\Delta CT}$ . The half maximal effective concentration (EC<sub>50</sub>) was calculated using the Reed & Muench method.<sup>1</sup>

<sup>1</sup> Z. G. Peng, B. Fan, N. N. Du, Y. P. Wang, L. M. Gao, Y. H. Li, Y. H. Li, F. Liu, X. F. You, Y. X. Han, Z. Y. Zhao, S. Cen, J. R. Li, D. Q. Song, J. D. Jiang, *Hepatology*, 2010, **52**, 845-853.
